# Supplementary material for: The mechanism and diastereoselectivity in the formation of trifluoromethyl-containing spiro[pyrrolidin-3,2′-oxindole] by a catalyst-free and mutually activated [3+2]-cycloaddition reaction: a theoretical study
Source: Royal Society of Chemistry journal article supplement (doi:10.1039/d0nj04063k), 2020-01-01
Supplement: d0nj04063k1.pdf [file d0nj04063k1.pdf]

Supporting Information  
for New Journal of Chemistry

**Mechanism and Diastereoselectivity in Formation of  
Trifluoromethyl-Containing Spiro[pyrrolidin-3,2'-oxindole] by a  
Catalyst-free and Mutually Activated [3+2]-Cycloaddition Reaction:  
A Theoretical Study**

Xingyu Wang, Yan Zhang, Yongsheng Yang, Ying Xue\*

College of Chemistry,  
Key Lab of Green Chemistry and Technology in Ministry of Education,  
Sichuan University, Chengdu 610064,  
People's Republic of China

## Constants

|                                                                                                                                    |     |
|------------------------------------------------------------------------------------------------------------------------------------|-----|
| Fig. S1. The mechanism and the free-energy profiles of path 0 .....                                                                | s3  |
| Fig. S2. The relaxed scan analysis from III to IV (The value of abscissa is the length of the red dotted line in the figure) ..... | s4  |
| Cartesian coordinates (Å) for all ground state and transition state geometries as well as the other data .....                     | s5  |
| Reaction mechanism.....                                                                                                            | s5  |
| Path 0 .....                                                                                                                       | s5  |
| Paths A to E .....                                                                                                                 | s14 |
| Analysis of the favored path E .....                                                                                               | s30 |
| NBO .....                                                                                                                          | s30 |
| Structures of E-TS1-CH <sub>3</sub> .....                                                                                          | s32 |
| Origin of diastereoselectivity .....                                                                                               | s34 |
| Structures of paths E-a/b/c/d.....                                                                                                 | s34 |
| Bond lengths of E-TS3-a/b/c/d.....                                                                                                 | s40 |
| Comparison with the other solvents .....                                                                                           | s59 |
| THF .....                                                                                                                          | s59 |
| Toluene .....                                                                                                                      | s64 |

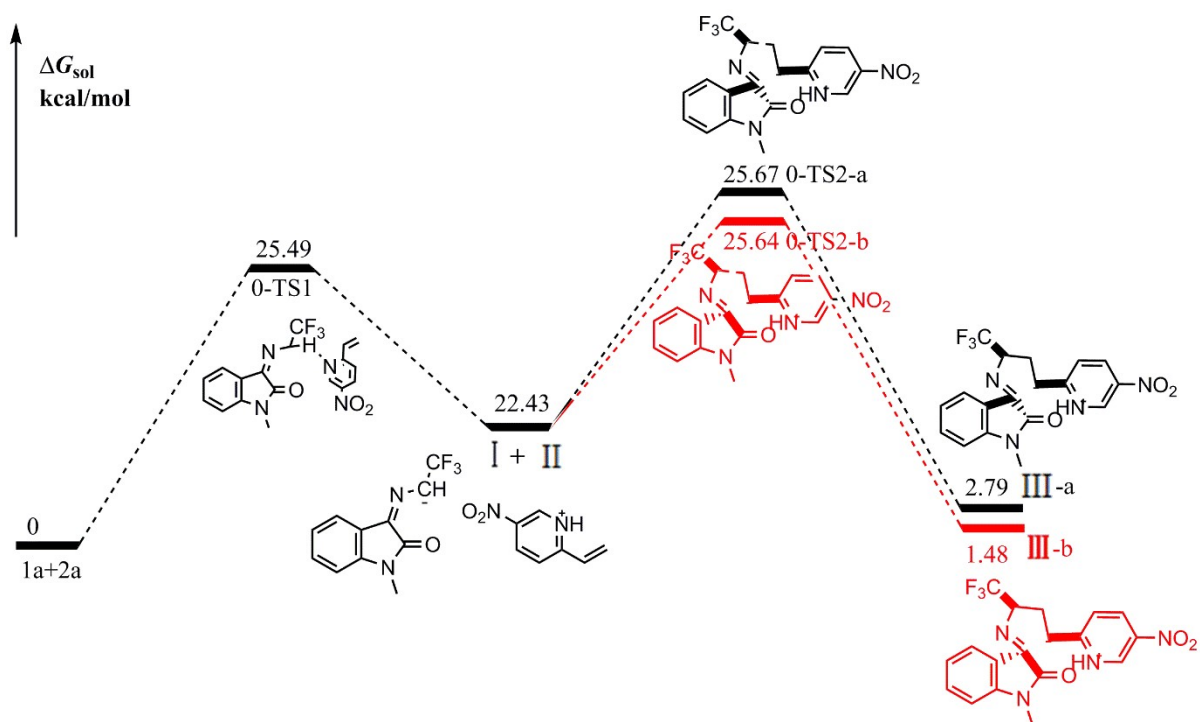

**Fig. S1** The mechanism and the free-energy profiles of path 0.

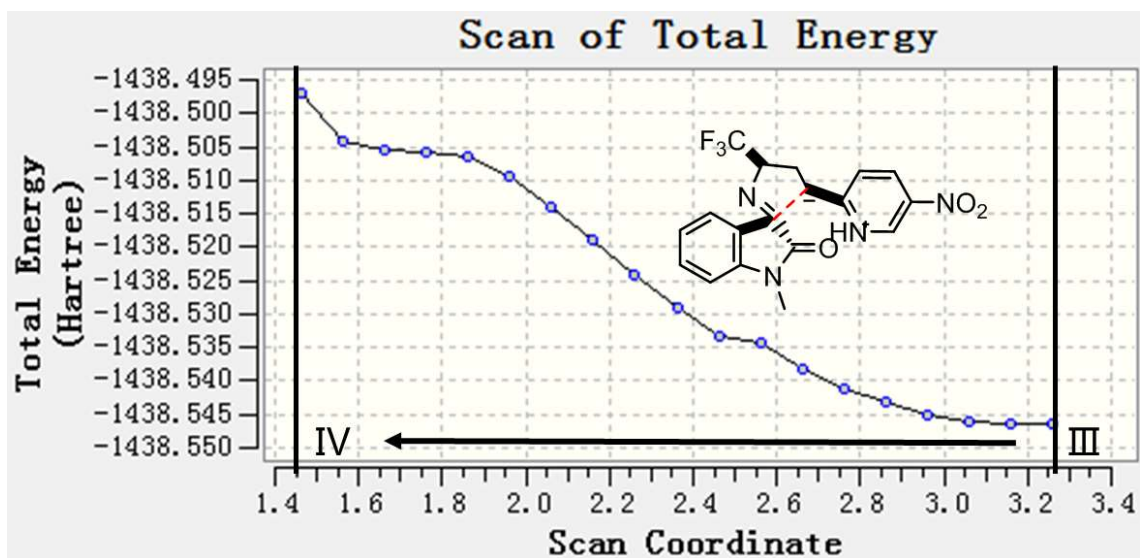

**Fig. S2** The relaxed scan analysis from III to IV (The value of abscissa is the length of the red dotted line in the figure).

## Cartesian coordinates (Å) for all ground state and transition state geometries as well as the other data

### Reaction mechanism

#### Path 0

##### 1a

0 1

|   |             |             |             |
|---|-------------|-------------|-------------|
| C | 1.05097700  | 0.65136400  | -0.00001000 |
| C | 2.34515100  | 0.09165500  | 0.00000100  |
| C | 3.48586500  | 0.87689100  | 0.00001200  |
| C | 3.31043400  | 2.26415600  | 0.00001400  |
| C | 2.04080400  | 2.83900500  | -0.00000100 |
| C | 0.89772100  | 2.03473700  | -0.00001500 |
| C | 0.11605000  | -0.48599400 | -0.00000100 |
| H | 4.47597400  | 0.43406200  | 0.00002100  |
| H | 4.18710000  | 2.90431700  | 0.00002600  |
| H | 1.93619500  | 3.91830000  | -0.00000100 |
| H | -0.08324800 | 2.49508200  | -0.00003100 |
| N | 2.28750300  | -1.30617100 | 0.00000300  |
| O | 0.61323200  | -2.89851000 | 0.00000600  |
| C | 0.98888600  | -1.74547100 | 0.00000600  |
| N | -1.14620800 | -0.61259200 | -0.00000200 |
| C | -1.96007600 | 0.58298700  | -0.00004000 |
| H | -1.78681100 | 1.19951300  | -0.89055800 |
| H | -1.78680700 | 1.19958700  | 0.89042700  |
| C | -3.40973500 | 0.17029800  | -0.00000200 |
| F | -3.72054600 | -0.56505400 | -1.07843200 |
| F | -4.21420300 | 1.24423900  | -0.00019300 |
| F | -3.72057500 | -0.56469000 | 1.07867200  |
| C | 3.44521800  | -2.17340600 | -0.00001300 |
| H | 4.05288200  | -1.99814200 | 0.89216000  |
| H | 3.08714300  | -3.20287100 | 0.00004200  |
| H | 4.05280500  | -1.99821600 | -0.89225400 |

##### 2a

0 1

|   |             |             |             |
|---|-------------|-------------|-------------|
| C | -1.65113000 | 0.26044200  | 0.00001600  |
| C | -0.86904800 | 1.42432400  | -0.00003400 |
| C | 0.51148300  | 1.31610000  | -0.00005300 |
| C | 1.04342400  | 0.03467800  | -0.00002400 |
| C | 0.21214700  | -1.08330800 | 0.00002200  |
| N | -1.10864500 | -0.97136400 | 0.00004200  |
| H | 1.15739000  | 2.18639400  | -0.00008900 |
| H | -1.34801500 | 2.39719100  | -0.00005500 |
| H | 0.63761300  | -2.08219100 | 0.00004400  |

|   |             |             |             |
|---|-------------|-------------|-------------|
| N | 2.48898700  | -0.15334000 | -0.00004100 |
| O | 2.91559200  | -1.29628200 | -0.00002400 |
| O | 3.19343000  | 0.84183600  | -0.00006900 |
| C | -3.12023600 | 0.37095600  | 0.00004500  |
| H | -3.51531000 | 1.38371200  | 0.00000800  |
| C | -3.94170400 | -0.67945300 | 0.00011700  |
| H | -3.55763000 | -1.69506200 | 0.00015700  |
| H | -5.01823100 | -0.54398100 | 0.00013800  |

### 3aa

O 1

|   |             |             |             |
|---|-------------|-------------|-------------|
| C | 1.81823000  | 2.49590600  | 0.31001400  |
| C | 0.85997900  | 1.49384700  | 0.51112400  |
| C | -0.27608300 | 1.77031100  | 1.25406100  |
| C | -0.45021700 | 3.06059700  | 1.77073300  |
| C | 0.50597300  | 4.04745600  | 1.54462300  |
| C | 1.66537700  | 3.78001600  | 0.80939000  |
| C | 2.71639800  | 0.66806000  | -0.72050800 |
| H | -1.02063000 | 1.00223500  | 1.44345400  |
| H | -1.33692000 | 3.29080900  | 2.35168600  |
| H | 0.35661300  | 5.04294500  | 1.95100000  |
| H | 2.41777200  | 4.54411600  | 0.64453900  |
| N | 2.89681000  | 1.99045300  | -0.42647100 |
| C | 4.06444400  | 2.75608700  | -0.80516400 |
| H | 3.77531100  | 3.61063700  | -1.42306500 |
| H | 4.58976500  | 3.11523900  | 0.08426400  |
| H | 4.72022000  | 2.09890800  | -1.37617000 |
| O | 3.49035400  | -0.03415100 | -1.34698700 |
| C | 0.50582100  | -0.36152300 | -1.35039800 |
| C | 0.96981500  | -1.83339300 | -1.39689900 |
| C | 1.75782500  | -2.05135600 | -0.07982500 |
| C | 1.39144200  | -3.31743400 | 0.64970700  |
| F | 2.19175100  | -3.52773100 | 1.70810000  |
| F | 0.13164000  | -3.30492500 | 1.11592600  |
| F | 1.50604800  | -4.38476200 | -0.15626600 |
| C | 1.34548700  | 0.22912000  | -0.15365700 |
| N | 1.53897300  | -0.88357700 | 0.78184700  |
| C | -0.96601500 | -0.21827300 | -1.06928200 |
| C | -1.72058300 | 0.78555300  | -1.68751100 |
| C | -2.76787300 | -0.92717700 | 0.16993300  |
| C | -3.05720800 | 0.92700400  | -1.35428200 |
| H | -1.25753500 | 1.44312100  | -2.41499700 |
| C | -3.57006400 | 0.04893600  | -0.40838900 |
| H | -3.17356200 | -1.61145000 | 0.90822700  |
| H | -3.68646600 | 1.68673800  | -1.80330700 |

|   |             |             |             |
|---|-------------|-------------|-------------|
| N | -1.48487400 | -1.05507400 | -0.15818100 |
| N | -4.97281900 | 0.14708800  | -0.01569600 |
| O | -5.65009700 | 1.01408700  | -0.54026500 |
| O | -5.38900900 | -0.64213100 | 0.81527500  |
| H | 0.11005400  | -2.50398200 | -1.46306100 |
| H | 0.74279000  | 0.17466700  | -2.27251900 |
| H | 2.82395300  | -2.13439400 | -0.30251200 |
| H | 1.61743500  | -2.01165600 | -2.25521100 |
| H | 0.64316100  | -1.00826300 | 1.26113400  |

**3ab**

0 1

|   |             |             |             |
|---|-------------|-------------|-------------|
| C | 2.77489300  | -1.85400000 | -0.29213300 |
| C | 2.55226000  | -0.59341100 | 0.27825300  |
| C | 3.53034700  | -0.02331700 | 1.07667300  |
| C | 4.73805300  | -0.70830200 | 1.26490700  |
| C | 4.94616200  | -1.95112800 | 0.67316400  |
| C | 3.95934600  | -2.55157100 | -0.11549900 |
| C | 0.66527600  | -1.31376400 | -0.97906500 |
| H | 3.37634400  | 0.93596600  | 1.56208400  |
| H | 5.51354700  | -0.26613600 | 1.88141600  |
| H | 5.88643900  | -2.47041500 | 0.83014700  |
| H | 4.11365700  | -3.52524500 | -0.56868200 |
| N | 1.64723300  | -2.26179200 | -1.01705400 |
| C | 1.56094400  | -3.49004100 | -1.77690300 |
| H | 2.32038400  | -3.50616300 | -2.56402500 |
| H | 1.70400800  | -4.35204200 | -1.11970500 |
| H | 0.56892500  | -3.53425300 | -2.22612900 |
| O | -0.39424400 | -1.35223200 | -1.57671800 |
| C | 0.27858400  | 0.14542600  | 1.18938500  |
| C | 0.52652800  | 1.65534500  | 1.41124300  |
| C | 1.19849300  | 2.14815500  | 0.10366300  |
| C | 0.61119000  | 3.42847500  | -0.43437700 |
| F | 1.29022100  | 3.87485500  | -1.50293600 |
| F | -0.66800500 | 3.28931200  | -0.81679200 |
| F | 0.64566200  | 4.39682000  | 0.49487000  |
| C | 1.15097000  | -0.15066600 | -0.08891500 |
| N | 1.09499700  | 1.07651600  | -0.88871800 |
| C | -1.17412400 | -0.17606200 | 0.94263100  |
| C | -1.73924000 | -1.35000200 | 1.45285900  |
| C | -3.12964300 | 0.41427900  | -0.10429400 |
| C | -3.06208200 | -1.64159700 | 1.16571700  |
| H | -1.14369200 | -2.01907300 | 2.06429500  |
| C | -3.75052400 | -0.73524700 | 0.37077300  |
| H | -3.67428100 | 1.12069100  | -0.72292600 |

|   |             |             |             |
|---|-------------|-------------|-------------|
| H | -3.54981500 | -2.53448200 | 1.53924300  |
| N | -1.86221600 | 0.68827000  | 0.18466200  |
| N | -5.14879400 | -0.98232900 | 0.03433500  |
| O | -5.67234800 | -1.98871000 | 0.48070000  |
| O | -5.71759800 | -0.16831100 | -0.67371200 |
| H | -0.41638400 | 2.17569700  | 1.59200000  |
| H | 0.63407200  | -0.45645100 | 2.02764100  |
| H | 2.25565200  | 2.36939900  | 0.28101000  |
| H | 1.18196200  | 1.82515100  | 2.26683800  |
| H | 0.14867200  | 1.10241300  | -1.28270600 |

**0-ts1**

0 1

|   |             |             |             |
|---|-------------|-------------|-------------|
| C | -1.32005700 | 2.06397900  | -0.93434400 |
| C | 0.05214000  | 2.15225000  | -0.62630500 |
| C | 0.55929600  | 3.30514000  | -0.04122900 |
| C | -0.31408700 | 4.36644300  | 0.21752400  |
| C | -1.67002300 | 4.26540400  | -0.09930200 |
| C | -2.19853000 | 3.10654500  | -0.68005400 |
| C | -0.45169300 | 0.04083000  | -1.55884100 |
| H | 1.61459900  | 3.37200700  | 0.20791300  |
| H | 0.06542600  | 5.27716300  | 0.66935800  |
| H | -2.33223300 | 5.09976800  | 0.10950100  |
| H | -3.25423300 | 3.02766000  | -0.91904100 |
| N | -1.59588000 | 0.80710000  | -1.48350700 |
| C | -2.90953100 | 0.33019500  | -1.85375500 |
| H | -3.58103900 | 0.34282200  | -0.98898100 |
| H | -3.33762700 | 0.94774900  | -2.64844600 |
| H | -2.79914900 | -0.69463700 | -2.21172000 |
| O | -0.40005700 | -1.10774600 | -1.99276300 |
| C | 1.19871500  | 0.46586800  | 2.32692500  |
| C | 1.06381400  | 1.66785100  | 2.89313000  |
| C | 2.26566100  | -0.81796700 | -0.75020300 |
| H | 1.94197200  | 2.22312600  | 3.20594900  |
| C | 3.71160100  | -0.98907600 | -0.46953300 |
| F | 4.03252300  | -2.29388100 | -0.35965100 |
| F | 4.53795800  | -0.48448800 | -1.42064700 |
| F | 4.09231900  | -0.39072800 | 0.68091700  |
| C | 0.64837900  | 0.86500500  | -0.97275900 |
| N | 1.84470900  | 0.47591500  | -0.65450500 |
| C | 0.07135100  | -0.33926000 | 1.85027100  |
| C | -1.27439600 | -0.07546000 | 2.14252800  |
| C | -0.54540300 | -2.19954700 | 0.54303600  |
| C | -2.26107300 | -0.88754300 | 1.61767700  |
| H | -1.53799000 | 0.76582400  | 2.77078500  |



|   |             |             |             |
|---|-------------|-------------|-------------|
| C | -1.87454300 | -1.96738500 | 0.82644400  |
| H | -0.21343900 | -2.98049200 | -0.13032000 |
| H | -3.31108800 | -0.69830900 | 1.80881800  |
| N | 0.38312200  | -1.39493100 | 1.06375700  |
| N | -2.88199300 | -2.81805500 | 0.20402200  |
| O | -4.05029200 | -2.51528600 | 0.36687000  |
| O | -2.49348900 | -3.76971600 | -0.44891800 |
| H | 0.09983300  | 2.14027800  | 3.05689700  |
| H | 2.18441400  | 0.04475900  | 2.15147900  |
| H | 1.87996200  | -1.48114200 | -1.52492200 |
| H | 1.40667000  | -1.33255400 | 0.44002800  |

### Compound I + II

0 1

|   |             |             |             |
|---|-------------|-------------|-------------|
| C | -1.67286500 | 1.68050500  | -0.95276700 |
| C | -0.30762600 | 1.97758800  | -0.69822700 |
| C | 0.02268800  | 3.22471200  | -0.16261100 |
| C | -0.99593500 | 4.14524300  | 0.09660000  |
| C | -2.33356200 | 3.83618900  | -0.17124800 |
| C | -2.68995800 | 2.59195200  | -0.70251100 |
| C | -0.48955000 | -0.20088100 | -1.50464400 |
| H | 1.06081000  | 3.47158100  | 0.04441200  |
| H | -0.74474700 | 5.11742800  | 0.51073500  |
| H | -3.10786900 | 4.56904300  | 0.03355300  |
| H | -3.72712500 | 2.34410000  | -0.90917700 |
| N | -1.75909200 | 0.38347800  | -1.43733300 |
| C | -2.97562200 | -0.29283600 | -1.81749200 |
| H | -3.68581100 | -0.32572400 | -0.98429800 |
| H | -3.45521700 | 0.20430100  | -2.66706700 |
| H | -2.70594200 | -1.31082900 | -2.10677600 |
| O | -0.29569400 | -1.37959100 | -1.85141800 |
| C | 1.40142600  | 0.74785400  | 2.22847100  |
| C | 1.23227900  | 1.96983000  | 2.74158000  |
| C | 2.39820200  | -0.46394200 | -1.06327300 |
| H | 2.09675700  | 2.57523600  | 2.99273400  |
| C | 3.80109900  | -0.57845300 | -0.58973000 |
| F | 3.88155200  | -1.34765100 | 0.53918200  |
| F | 4.60289500  | -1.18877900 | -1.48460800 |
| F | 4.36535000  | 0.59364800  | -0.27680300 |
| C | 0.44764400  | 0.80357600  | -1.04516100 |
| N | 1.77071400  | 0.63835200  | -0.81702000 |
| C | 0.29571500  | -0.11818200 | 1.83802700  |
| C | -1.06566000 | 0.19682700  | 1.93994100  |
| C | -0.25250500 | -2.22489100 | 0.86026500  |
| C | -2.01502900 | -0.69922100 | 1.49195000  |

|   |             |             |             |
|---|-------------|-------------|-------------|
| H | -1.36943500 | 1.15268300  | 2.34740100  |
| C | -1.58887400 | -1.91185300 | 0.94741900  |
| H | 0.13118900  | -3.14278400 | 0.43654600  |
| H | -3.07365000 | -0.46816600 | 1.54406600  |
| N | 0.62716000  | -1.33263600 | 1.33022200  |
| N | -2.55236200 | -2.85369000 | 0.39663200  |
| O | -3.73269500 | -2.56790200 | 0.49072400  |
| O | -2.11875200 | -3.86368300 | -0.12676400 |
| H | 0.25522500  | 2.40424300  | 2.92856600  |
| H | 2.39974500  | 0.35655500  | 2.04973300  |
| H | 1.95931300  | -1.35960200 | -1.49951400 |
| H | 1.61957500  | -1.56623900 | 1.25174200  |

**0-TS2-a**

0 1

|   |             |             |             |
|---|-------------|-------------|-------------|
| C | 1.16014500  | 1.34865000  | 0.96958100  |
| C | 0.04240400  | 0.49319800  | 1.16937300  |
| C | 0.20757100  | -0.63603800 | 1.97519200  |
| C | 1.46174300  | -0.90488500 | 2.53387400  |
| C | 2.54695900  | -0.05813200 | 2.30486300  |
| C | 2.40578800  | 1.09348500  | 1.52332900  |
| C | -0.55774900 | 2.35211800  | -0.16096600 |
| H | -0.61854200 | -1.30811700 | 2.18011300  |
| H | 1.59005900  | -1.78769700 | 3.15256200  |
| H | 3.51489000  | -0.29085900 | 2.73911500  |
| H | 3.24455400  | 1.75926400  | 1.34399200  |
| N | 0.79316100  | 2.41588700  | 0.16399700  |
| C | 1.68308400  | 3.45857200  | -0.28543400 |
| H | 2.52675100  | 3.03167300  | -0.83770200 |
| H | 1.11153800  | 4.11410300  | -0.94341200 |
| H | 2.06897700  | 4.03925300  | 0.55843400  |
| O | -1.13989500 | 3.18169900  | -0.84917700 |
| C | -1.21646600 | -0.54045200 | -2.09908100 |
| C | -2.26055000 | -1.31297100 | -1.67801000 |
| C | -2.80637500 | -0.42559200 | 0.49925300  |
| C | -4.28198500 | -0.61186000 | 0.40048000  |
| F | -4.92623000 | -0.34308800 | 1.56047300  |
| F | -4.84771300 | 0.17113700  | -0.53103200 |
| F | -4.59475700 | -1.88880400 | 0.09688400  |
| C | -1.06629200 | 1.09802500  | 0.44456800  |
| N | -2.34100000 | 0.77899500  | 0.27925100  |
| C | 0.14250200  | -0.71465300 | -1.72616500 |
| C | 1.16474300  | 0.19482100  | -2.10293800 |
| C | 1.77596400  | -1.98431700 | -0.50708700 |
| C | 2.44503600  | 0.03645600  | -1.64936300 |

|   |             |             |             |
|---|-------------|-------------|-------------|
| H | 0.89073200  | 1.04270300  | -2.72038300 |
| C | 2.74552100  | -1.07787100 | -0.83383300 |
| H | 1.94877300  | -2.85441500 | 0.11311700  |
| H | 3.22660000  | 0.74494300  | -1.89863900 |
| N | 0.52855400  | -1.78410700 | -0.96444300 |
| N | 4.06359300  | -1.23813700 | -0.26404200 |
| O | 4.87720100  | -0.35268800 | -0.47281500 |
| O | 4.28930500  | -2.23940000 | 0.39846900  |
| H | -3.25306000 | -1.10342400 | -2.06110100 |
| H | -1.41417800 | 0.36146900  | -2.66939600 |
| H | -2.28415800 | -1.22913800 | 1.01638300  |
| H | -2.13780300 | -2.28358700 | -1.20646100 |
| H | -0.17211900 | -2.46605100 | -0.68452000 |

**0-TS2-b**

0 1

|   |             |             |             |
|---|-------------|-------------|-------------|
| C | 0.99374900  | 1.97967200  | 0.61695600  |
| C | -0.32019300 | 2.07980600  | 0.10694700  |
| C | -0.67979900 | 3.19594600  | -0.64742400 |
| C | 0.26903000  | 4.19474000  | -0.86802600 |
| C | 1.56279600  | 4.08371400  | -0.34612700 |
| C | 1.94536000  | 2.97049200  | 0.40688200  |
| C | -0.06946700 | 0.06126300  | 1.27331400  |
| H | -1.68496900 | 3.28096900  | -1.05071200 |
| H | 0.00096200  | 5.07026800  | -1.45110500 |
| H | 2.28465100  | 4.87398700  | -0.52707000 |
| H | 2.94762200  | 2.88354200  | 0.81532100  |
| N | 1.12278000  | 0.77857100  | 1.30778000  |
| C | 2.28689800  | 0.39389200  | 2.07051400  |
| H | 2.38509000  | 1.00496900  | 2.97405500  |
| H | 2.17728600  | -0.65434700 | 2.35526400  |
| H | 3.19274600  | 0.51764400  | 1.46776100  |
| O | -0.22404400 | -1.04749600 | 1.79627700  |
| C | -1.04292000 | -0.93834900 | -1.90977000 |
| C | -2.11353200 | -1.68106600 | -1.52192700 |
| C | -2.85518600 | -0.52216200 | 0.54137200  |
| C | -4.32339000 | -0.64677900 | 0.31727500  |
| F | -5.05801300 | -0.23230600 | 1.37563900  |
| F | -4.75584800 | 0.06312300  | -0.73690300 |
| F | -4.67500000 | -1.93216800 | 0.10750900  |
| C | -1.02044800 | 0.87608500  | 0.50020600  |
| N | -2.31179100 | 0.63523700  | 0.27367600  |
| C | 0.30051100  | -1.08928100 | -1.45609200 |
| C | 1.33738400  | -0.20631100 | -1.85492500 |
| C | 1.88931600  | -2.30642000 | -0.14245800 |

|   |             |             |             |
|---|-------------|-------------|-------------|
| C | 2.61268900  | -0.36089400 | -1.38451400 |
| H | 1.08185700  | 0.61357300  | -2.51606200 |
| C | 2.88185400  | -1.43858500 | -0.51382300 |
| H | 2.03803300  | -3.13712400 | 0.53548500  |
| H | 3.40686900  | 0.32268700  | -1.66170400 |
| N | 0.65584500  | -2.11903800 | -0.63066500 |
| N | 4.20161500  | -1.61634700 | 0.05293400  |
| O | 5.05274600  | -0.79027600 | -0.23568000 |
| O | 4.38776600  | -2.56975800 | 0.79230400  |
| H | -3.07757100 | -1.49409700 | -1.98191800 |
| H | -1.19725300 | -0.08057800 | -2.55714000 |
| H | -2.39231600 | -1.30539100 | 1.13701300  |
| H | -2.03638600 | -2.59619200 | -0.94166700 |
| H | -0.06567500 | -2.75106200 | -0.29329600 |

### III-a

0 1

|   |             |             |             |
|---|-------------|-------------|-------------|
| C | 1.42780800  | 2.61685300  | -0.38820700 |
| C | 1.07118000  | 1.26055500  | -0.53197900 |
| C | -0.13522700 | 0.93992700  | -1.15032900 |
| C | -0.96566100 | 1.96681500  | -1.60227100 |
| C | -0.59467800 | 3.30091100  | -1.43872500 |
| C | 0.61290900  | 3.64821300  | -0.82983200 |
| C | 3.20307700  | 1.52536000  | 0.54051300  |
| H | -0.44687300 | -0.08812500 | -1.28819900 |
| H | -1.90686600 | 1.72116900  | -2.08244700 |
| H | -1.25395800 | 4.08798400  | -1.79137500 |
| H | 0.90311000  | 4.68606800  | -0.70666800 |
| N | 2.67060700  | 2.75044500  | 0.23980400  |
| C | 3.32265000  | 4.01252100  | 0.51271600  |
| H | 2.69979700  | 4.63183300  | 1.16377900  |
| H | 4.26645800  | 3.79418200  | 1.01242300  |
| H | 3.51881000  | 4.55135300  | -0.41854900 |
| O | 4.26766000  | 1.31213300  | 1.08110800  |
| C | -0.11751300 | -1.12160200 | 1.72983700  |
| C | 0.74077200  | -2.21792700 | 1.17516700  |
| C | 1.52019600  | -1.78304200 | -0.08996400 |
| C | 2.33750300  | -2.94937000 | -0.61240200 |
| F | 3.09295700  | -2.59236800 | -1.66192100 |
| F | 3.16333800  | -3.44967400 | 0.31793800  |
| F | 1.53827700  | -3.95021100 | -1.01731100 |
| C | 2.18122800  | 0.48279900  | 0.06367400  |
| N | 2.45671500  | -0.74025300 | 0.26165200  |
| C | -1.36123300 | -0.82132000 | 1.30267500  |
| C | -2.15424500 | 0.29061200  | 1.81533400  |

|   |             |             |             |
|---|-------------|-------------|-------------|
| C | -3.21850500 | -1.29888600 | -0.19662800 |
| C | -3.38644000 | 0.56995700  | 1.34744200  |
| H | -1.70273100 | 0.89382700  | 2.59540500  |
| C | -3.94633500 | -0.25811100 | 0.30983200  |
| H | -3.59071000 | -1.94427900 | -0.98276800 |
| H | -3.96716300 | 1.40059200  | 1.72984800  |
| N | -1.99176600 | -1.55385200 | 0.27330300  |
| N | -5.24687800 | -0.00919900 | -0.20726300 |
| O | -5.87753600 | 0.93552700  | 0.26027900  |
| O | -5.68814800 | -0.74131100 | -1.09182200 |
| H | 1.47660700  | -2.52618200 | 1.92298300  |
| H | 0.29674800  | -0.48688100 | 2.50568000  |
| H | 0.82841300  | -1.51521300 | -0.89592900 |
| H | 0.15670300  | -3.10978800 | 0.91817800  |
| H | -1.49095700 | -2.33262700 | -0.14083900 |

### III-b

0 1

|   |             |             |             |
|---|-------------|-------------|-------------|
| C | -1.42294100 | 2.65771800  | 0.34808700  |
| C | -2.38355100 | 1.67615300  | 0.06605300  |
| C | -3.63377300 | 2.02555600  | -0.41872400 |
| C | -3.91847600 | 3.38096500  | -0.60157900 |
| C | -2.95400800 | 4.34848900  | -0.31526200 |
| C | -1.68404300 | 4.00581200  | 0.16287400  |
| C | -0.37087100 | 0.69922000  | 0.90398800  |
| H | -4.36859900 | 1.25769100  | -0.64152900 |
| H | -4.89241200 | 3.68521900  | -0.96941600 |
| H | -3.19066800 | 5.39702700  | -0.46753900 |
| H | -0.93859300 | 4.76420000  | 0.37723900  |
| N | -0.24355000 | 2.06080000  | 0.81973700  |
| C | 0.91778800  | 2.79114100  | 1.28086100  |
| H | 0.64492600  | 3.46512300  | 2.09796100  |
| H | 1.64596000  | 2.06325400  | 1.63914900  |
| H | 1.35162500  | 3.37147500  | 0.46204400  |
| O | 0.43850600  | -0.05980000 | 1.40637000  |
| C | 0.00509700  | -0.98875500 | -1.79987400 |
| C | -0.81967000 | -2.15742500 | -1.35235400 |
| C | -1.44459900 | -1.94197100 | 0.05886700  |
| C | -2.34640000 | -3.10677200 | 0.40280000  |
| F | -2.90590000 | -2.95773600 | 1.61395800  |
| F | -3.34838800 | -3.25802900 | -0.47673500 |
| F | -1.65722400 | -4.25990600 | 0.42230300  |
| C | -1.75442200 | 0.37078000  | 0.30819600  |
| N | -2.26888300 | -0.75341500 | 0.01463200  |
| C | 1.25741400  | -0.71245400 | -1.37567800 |

|   |             |             |             |
|---|-------------|-------------|-------------|
| C | 1.98515900  | 0.50372600  | -1.71775900 |
| C | 3.14095500  | -1.30711700 | 0.03782400  |
| C | 3.19251800  | 0.78830900  | -1.18896700 |
| H | 1.49964100  | 1.19116400  | -2.40203200 |
| C | 3.79482300  | -0.14609700 | -0.27504200 |
| H | 3.55198000  | -2.04309800 | 0.71777500  |
| H | 3.72068700  | 1.70240100  | -1.43223000 |
| N | 1.94965800  | -1.57331300 | -0.50307100 |
| N | 5.06031400  | 0.11520800  | 0.31483200  |
| O | 5.62466500  | 1.16608700  | 0.02031300  |
| O | 5.53945900  | -0.71003200 | 1.09154500  |
| H | -1.63903100 | -2.31968700 | -2.05746400 |
| H | -0.45206700 | -0.26151600 | -2.46212500 |
| H | -0.65704800 | -1.90821700 | 0.81737400  |
| H | -0.24134200 | -3.08803500 | -1.31317500 |
| H | 1.49873200  | -2.43463700 | -0.21636500 |

## Paths A-E

### Path A

#### A-TS1

0 1

|   |             |             |             |
|---|-------------|-------------|-------------|
| C | -1.45431300 | -0.78202500 | -0.13290700 |
| C | -2.38636800 | 0.26424500  | -0.00554700 |
| C | -3.74660600 | 0.03627500  | 0.13097800  |
| C | -4.16451200 | -1.29622400 | 0.15035800  |
| C | -3.25255100 | -2.34959500 | 0.02737900  |
| C | -1.88840000 | -2.10283200 | -0.12384000 |
| C | -0.15178600 | -0.15326100 | -0.30793300 |
| H | -4.45378300 | 0.85344400  | 0.22882900  |
| H | -5.22136600 | -1.51517900 | 0.26398100  |
| H | -3.61329300 | -3.37263900 | 0.04692300  |
| H | -1.17704400 | -2.91560900 | -0.23149300 |
| N | -1.70743600 | 1.50104900  | -0.03204600 |
| O | 0.52022100  | 2.16449900  | -0.15770900 |
| C | -0.40246500 | 1.28413500  | -0.24583000 |
| N | 1.04863900  | -0.63196500 | -0.12851200 |
| C | 2.09854600  | 0.21630900  | -0.38134900 |
| H | 2.16606100  | 0.65856700  | -1.37970300 |
| H | 1.48029000  | 1.50865500  | -0.02574700 |
| C | 3.40878100  | -0.31980900 | 0.07535800  |
| F | 3.40623600  | -0.62224000 | 1.38717900  |
| F | 4.39326800  | 0.57382500  | -0.12873700 |
| F | 3.78361900  | -1.45358500 | -0.56023800 |
| C | -2.32200900 | 2.79401400  | 0.21138200  |

|   |             |            |             |
|---|-------------|------------|-------------|
| H | -2.72601100 | 2.82852400 | 1.22559000  |
| H | -1.55920400 | 3.56324000 | 0.09555600  |
| H | -3.12385600 | 2.96203200 | -0.51048400 |

**INT1**

0 1

|   |             |             |             |
|---|-------------|-------------|-------------|
| C | -1.32000900 | -0.73775500 | 0.00883500  |
| C | -2.44658900 | 0.11292500  | 0.00578700  |
| C | -3.75189000 | -0.37558700 | -0.00851000 |
| C | -3.91377900 | -1.75643500 | -0.01065000 |
| C | -2.80472600 | -2.62007200 | -0.00335300 |
| C | -1.50769300 | -2.12437900 | 0.00646900  |
| C | -0.15028900 | 0.10459200  | 0.00645300  |
| H | -4.60754900 | 0.29170200  | -0.02273200 |
| H | -4.91598400 | -2.17264700 | -0.02169900 |
| H | -2.96836900 | -3.69321400 | -0.00762100 |
| H | -0.65142400 | -2.79210300 | 0.00933000  |
| N | -1.99075100 | 1.42837500  | 0.01597600  |
| O | 0.11326300  | 2.52125800  | -0.00495600 |
| C | -0.62917900 | 1.41147800  | -0.00014500 |
| N | 1.13996500  | -0.37898200 | -0.01581100 |
| C | 2.17081500  | 0.36670600  | 0.03878000  |
| H | 2.18684200  | 1.45432700  | 0.12082800  |
| C | 3.52162600  | -0.28373000 | 0.00116400  |
| F | 3.46372700  | -1.60998900 | -0.13682300 |
| F | 4.21634500  | -0.02571000 | 1.12652500  |
| F | 4.26218400  | 0.19714700  | -1.01549700 |
| C | -2.82546800 | 2.61696000  | 0.01769200  |
| H | -3.75711400 | 2.39102400  | 0.53698500  |
| H | -2.32767800 | 3.41844300  | 0.56793200  |
| H | -3.04659100 | 2.94810200  | -1.00032400 |
| H | -0.39995400 | 3.29729400  | -0.28717700 |

**A-TS2**

0 1

|   |             |             |             |
|---|-------------|-------------|-------------|
| C | 0.98085300  | 1.36866900  | 1.02714700  |
| C | -0.09623300 | 0.48868200  | 1.26466100  |
| C | 0.11907700  | -0.62417200 | 2.07942200  |
| C | 1.39112900  | -0.83400800 | 2.61017100  |
| C | 2.44578300  | 0.04236900  | 2.33562400  |
| C | 2.25190000  | 1.17212900  | 1.53969000  |
| C | -0.76025000 | 2.28079400  | -0.00742000 |
| H | -0.68158300 | -1.32063700 | 2.30253600  |
| H | 1.56785500  | -1.70024600 | 3.23962600  |
| H | 3.42949000  | -0.15109300 | 2.75168900  |
| H | 3.06326900  | 1.86114100  | 1.32699000  |

|   |             |             |             |
|---|-------------|-------------|-------------|
| N | 0.53941400  | 2.43357500  | 0.21156000  |
| C | 1.37909100  | 3.51462000  | -0.27969600 |
| H | 1.64081700  | 4.18511600  | 0.54177800  |
| H | 2.28537500  | 3.08942000  | -0.71401300 |
| H | 0.83150300  | 4.06325200  | -1.04502700 |
| O | -1.45631400 | 3.13309400  | -0.72104800 |
| C | -2.77062000 | -0.58373600 | 0.24548300  |
| C | -4.23708000 | -0.91289100 | 0.19005200  |
| F | -4.83164400 | -0.77418900 | 1.38939700  |
| F | -4.90385400 | -0.12626000 | -0.66716500 |
| F | -4.43239700 | -2.18512100 | -0.19466900 |
| C | -1.25214000 | 1.06329500  | 0.57605300  |
| N | -2.50894400 | 0.73515600  | 0.34940700  |
| H | -2.37050500 | 2.78277500  | -0.76509100 |
| H | -2.22865200 | -1.31053200 | 0.85493700  |
| C | -1.00545500 | -0.27447200 | -1.85191800 |
| C | -2.10409300 | -1.06951500 | -1.46028600 |
| C | 0.35690500  | -0.58155300 | -1.60080400 |
| C | 1.37953900  | 0.32001800  | -2.01643300 |
| C | 1.91014800  | -1.92761900 | -0.55410600 |
| C | 2.68030200  | 0.09540100  | -1.64102800 |
| H | 1.11092700  | 1.19606100  | -2.59881800 |
| C | 2.94433200  | -1.04074400 | -0.86685000 |
| H | 2.12983300  | -2.82325800 | 0.02110700  |
| H | 3.48214600  | 0.77613100  | -1.90468300 |
| N | 0.65743300  | -1.72056900 | -0.91208300 |
| N | 4.25909500  | -1.27161500 | -0.34245500 |
| O | 5.13816700  | -0.45568100 | -0.59859300 |
| O | 4.44784900  | -2.26773600 | 0.34843900  |
| H | -3.01274400 | -0.91276700 | -2.03773900 |
| H | -1.19457100 | 0.65214700  | -2.38834400 |
| H | -1.88781800 | -2.11423800 | -1.24698300 |

**INT2+2a**

|     |             |             |             |
|-----|-------------|-------------|-------------|
| 0 1 |             |             |             |
| C   | -1.40949200 | 1.32798400  | -1.20364500 |
| C   | -0.38983600 | 0.36765900  | -1.42536500 |
| C   | -0.74128400 | -0.85112900 | -2.02056200 |
| C   | -2.07385300 | -1.08298900 | -2.34756200 |
| C   | -3.06370500 | -0.11904000 | -2.10735800 |
| C   | -2.74214300 | 1.10716400  | -1.53321800 |
| C   | 0.46091700  | 2.19962300  | -0.39471600 |
| H   | 0.00071200  | -1.61763700 | -2.21517300 |
| H   | -2.35344600 | -2.03103000 | -2.79632800 |
| H   | -4.09603900 | -0.33388300 | -2.36419200 |



|   |             |             |             |
|---|-------------|-------------|-------------|
| H | -3.50144800 | 1.85871700  | -1.33947000 |
| N | -0.85494500 | 2.44077900  | -0.57568300 |
| C | -1.59783200 | 3.58972100  | -0.09457400 |
| H | -2.06557000 | 4.11407100  | -0.93093200 |
| H | -2.36996500 | 3.26313600  | 0.60776100  |
| H | -0.90927800 | 4.26381500  | 0.41383400  |
| O | 1.22728100  | 3.07869000  | 0.23971200  |
| C | 2.53737500  | -0.62744700 | -0.97129500 |
| C | 3.95074700  | -0.97081400 | -0.61261100 |
| F | 4.70171800  | -1.22637100 | -1.70095100 |
| F | 4.56506100  | -0.00518900 | 0.07727600  |
| F | 3.99029500  | -2.08946600 | 0.14047200  |
| C | 0.82562100  | 0.95617900  | -0.90433500 |
| N | 2.11256200  | 0.54124600  | -0.69442200 |
| H | 2.10731800  | 2.66495800  | 0.32713600  |
| H | 1.96852600  | -1.43604100 | -1.43048800 |
| C | 1.26068500  | 0.65182600  | 2.54543700  |
| C | 2.46710800  | 0.08660500  | 2.47207800  |
| C | 0.02631100  | 0.01612100  | 2.05333300  |
| C | -1.18300400 | 0.72484500  | 2.11262900  |
| C | -0.99762500 | -1.79958800 | 1.08964200  |
| C | -2.34008100 | 0.13624100  | 1.62993100  |
| H | -1.20102600 | 1.72892900  | 2.52422300  |
| C | -2.22848400 | -1.14735400 | 1.11336400  |
| H | -0.91952200 | -2.80230800 | 0.68047400  |
| H | -3.29681000 | 0.64592400  | 1.64365500  |
| N | 0.10819800  | -1.23122200 | 1.55179100  |
| N | -3.40451200 | -1.81846000 | 0.58208100  |
| O | -4.47099000 | -1.22825900 | 0.63562800  |
| O | -3.26421700 | -2.93711900 | 0.11457800  |
| H | 3.34892500  | 0.60139300  | 2.83991600  |
| H | 1.13985600  | 1.64477900  | 2.97227800  |
| H | 2.59983900  | -0.90213600 | 2.04338500  |

### A-TS3

0 1

|   |             |             |             |
|---|-------------|-------------|-------------|
| C | 0.76799100  | 1.48465500  | 1.04879500  |
| C | -0.30331800 | 0.61558100  | 1.31989400  |
| C | -0.14843200 | -0.35346800 | 2.30399200  |
| C | 1.06619600  | -0.42263800 | 2.99187000  |
| C | 2.11819300  | 0.44428600  | 2.69211300  |
| C | 1.98456600  | 1.42383600  | 1.70321200  |
| C | -0.84550000 | 2.12851100  | -0.33362800 |
| H | -0.94782200 | -1.04944200 | 2.53483100  |
| H | 1.19641400  | -1.17175600 | 3.76597400  |

|   |             |             |             |
|---|-------------|-------------|-------------|
| H | 3.05425300  | 0.36446000  | 3.23505800  |
| H | 2.79520400  | 2.10481200  | 1.46423600  |
| N | 0.39291200  | 2.39350500  | 0.01850300  |
| C | 1.25611100  | 3.42923500  | -0.53139200 |
| H | 2.19569400  | 2.97521900  | -0.85122700 |
| H | 0.75606100  | 3.88324500  | -1.38596100 |
| H | 1.44793500  | 4.18593900  | 0.23161100  |
| O | -1.52293200 | 2.79006700  | -1.22535400 |
| C | -0.86286000 | -0.40546600 | -1.20609400 |
| C | -1.91250100 | -1.36491700 | -0.75249700 |
| C | -2.91360600 | -0.66233300 | 0.28972100  |
| C | -4.34792300 | -0.95092000 | -0.07850900 |
| F | -5.21521400 | -0.40999800 | 0.79367600  |
| F | -4.67026500 | -0.47434600 | -1.29298700 |
| F | -4.58813800 | -2.27589900 | -0.10107400 |
| C | -1.38316000 | 0.95788700  | 0.35724000  |
| N | -2.68638100 | 0.74130600  | 0.25307900  |
| C | 0.54233500  | -0.68813100 | -1.15043600 |
| C | 1.45322300  | 0.15923800  | -1.83388200 |
| C | 2.28231800  | -1.83418100 | -0.16097100 |
| C | 2.80825300  | 0.00069600  | -1.64971500 |
| H | 1.07043800  | 0.93457300  | -2.49105000 |
| C | 3.22319800  | -1.01100400 | -0.78202800 |
| H | 2.61433000  | -2.63111800 | 0.49883200  |
| H | 3.53481600  | 0.63240600  | -2.14811900 |
| N | 0.98063600  | -1.68682700 | -0.33940200 |
| N | 4.62976400  | -1.22337500 | -0.53319900 |
| O | 5.43034400  | -0.47235000 | -1.07333300 |
| O | 4.95479700  | -2.14184700 | 0.20753700  |
| H | -2.50532700 | -1.69605900 | -1.61031400 |
| H | -1.14730200 | 0.25047700  | -2.02690200 |
| H | -2.41394100 | 2.36026600  | -1.22516400 |
| H | -2.75552000 | -1.14510600 | 1.26610300  |
| H | -1.45938300 | -2.24016100 | -0.28421800 |

**Path B**  
**B-TS2**

0 1

|   |             |             |             |
|---|-------------|-------------|-------------|
| C | -1.34607500 | -0.75825400 | -0.00022400 |
| C | -2.44352200 | 0.15123200  | -0.00000200 |
| C | -3.75958300 | -0.28040500 | 0.00019400  |
| C | -3.98976700 | -1.65865400 | 0.00021300  |
| C | -2.92672700 | -2.56626200 | 0.00002100  |
| C | -1.60190500 | -2.13003800 | -0.00020500 |

|   |             |             |             |
|---|-------------|-------------|-------------|
| C | -0.18587500 | 0.08762300  | -0.00040400 |
| H | -4.58200500 | 0.42821700  | 0.00034900  |
| H | -5.01073400 | -2.02609000 | 0.00038500  |
| H | -3.13491000 | -3.63160100 | 0.00005300  |
| H | -0.78447900 | -2.84380900 | -0.00036300 |
| N | -1.97232400 | 1.47793800  | -0.00000300 |
| O | 0.25975400  | 2.35869700  | -0.00005900 |
| C | -0.62464400 | 1.43695300  | -0.00017900 |
| N | 1.16236600  | 0.12746800  | -0.00032700 |
| C | 2.07975600  | -0.77354400 | -0.00018100 |
| H | 1.87147600  | -1.83856100 | -0.00010700 |
| H | 1.18013800  | 1.41531100  | -0.00017500 |
| C | 3.50554400  | -0.33902900 | 0.00008300  |
| F | 4.16471400  | -0.80561300 | -1.07509500 |
| F | 4.16423800  | -0.80571300 | 1.07551800  |
| F | 3.62846900  | 0.99452700  | 0.00015500  |
| C | -2.80044600 | 2.66752200  | 0.00015800  |
| H | -3.43081400 | 2.68999500  | 0.89235100  |
| H | -2.14335200 | 3.53732900  | 0.00015900  |
| H | -3.43097100 | 2.69011900  | -0.89192200 |

### Path C

#### C-TS1

0 1

|   |             |             |             |
|---|-------------|-------------|-------------|
| C | 1.10493900  | 0.66268400  | -0.04977700 |
| C | 2.38828800  | 0.06637300  | 0.01138800  |
| C | 3.54938700  | 0.82032900  | 0.05584500  |
| C | 3.41864100  | 2.21322900  | 0.04126000  |
| C | 2.16547500  | 2.82058700  | -0.01257000 |
| C | 0.99838600  | 2.05158700  | -0.05898700 |
| C | 0.16479700  | -0.44492000 | -0.06862100 |
| H | 4.52448300  | 0.34653000  | 0.10255000  |
| H | 4.31270900  | 2.82799800  | 0.07251600  |
| H | 2.09091300  | 3.90286300  | -0.02094500 |
| H | 0.03487600  | 2.54628700  | -0.09833100 |
| N | 2.27352100  | -1.32269700 | 0.01741800  |
| O | 0.53998900  | -2.85978500 | -0.04333200 |
| C | 0.94703800  | -1.70916800 | -0.03009100 |
| N | -1.14306000 | -0.50738000 | -0.08502500 |
| C | -2.03998400 | 0.50181000  | -0.31773700 |
| H | -1.77248400 | -0.65904000 | -1.07619100 |
| C | -3.46215200 | 0.19882800  | 0.02558200  |
| F | -3.76020000 | 0.55795700  | 1.28969300  |
| F | -3.75464300 | -1.10425100 | -0.08601700 |

|   |             |             |             |
|---|-------------|-------------|-------------|
| F | -4.30017800 | 0.88171500  | -0.76739800 |
| C | 3.38404400  | -2.24522000 | 0.07572400  |
| H | 4.06117700  | -2.08617000 | -0.76839100 |
| H | 3.93983900  | -2.12405900 | 1.01028600  |
| H | 2.97469800  | -3.25455400 | 0.02600000  |
| H | -1.77731900 | 1.55344900  | -0.38618000 |

**Path D**

**D-TS1**

0 1

|   |             |             |             |
|---|-------------|-------------|-------------|
| C | -3.11665400 | 0.75808900  | -0.16798900 |
| C | -3.07038200 | 0.17189200  | -1.44624800 |
| C | -4.18006400 | -0.42596300 | -2.02354900 |
| C | -5.36642400 | -0.43037400 | -1.28017000 |
| C | -5.42861200 | 0.14486200  | -0.01008000 |
| C | -4.30061500 | 0.74779800  | 0.55592600  |
| C | -1.78093700 | 1.29086300  | 0.11448800  |
| H | -4.13003400 | -0.87594400 | -3.00993800 |
| H | -6.25359900 | -0.89001900 | -1.70464400 |
| H | -6.36237500 | 0.12566800  | 0.54271800  |
| H | -4.34299900 | 1.20117000  | 1.54224900  |
| N | -1.77831200 | 0.29552500  | -1.96516500 |
| O | 0.25463700  | 1.12942700  | -1.26199100 |
| C | -0.94971900 | 0.96425800  | -1.08960000 |
| N | -1.40564100 | 1.70968200  | 1.28274000  |
| C | -0.17099500 | 2.15105200  | 1.66932700  |
| H | -0.16513900 | 2.50061000  | 2.70196400  |
| H | 0.57385400  | 0.69282100  | 1.69498500  |
| C | 0.61874300  | 3.11642200  | 0.82888100  |
| F | 1.79639700  | 2.67059900  | 0.34354600  |
| F | 0.95466800  | 4.19393700  | 1.58465100  |
| F | -0.06925000 | 3.59921000  | -0.22140100 |
| C | -1.31870600 | -0.31672500 | -3.19133200 |
| H | -1.83480300 | 0.11027400  | -4.05620800 |
| H | -0.24862400 | -0.11958300 | -3.27484700 |
| H | -1.48964900 | -1.39676200 | -3.16330100 |
| C | 2.64361900  | -0.26415600 | 0.04057600  |
| C | 2.98969900  | -0.85584100 | -1.18869700 |
| C | 4.21287800  | -0.61387800 | -1.78734900 |
| C | 5.09324300  | 0.23471800  | -1.10772800 |
| C | 4.77370400  | 0.80953300  | 0.12637600  |
| C | 3.53977100  | 0.55762900  | 0.71906200  |
| C | 1.34408800  | -0.77324400 | 0.39016700  |
| H | 4.48265600  | -1.06606600 | -2.73524500 |

|   |             |             |             |
|---|-------------|-------------|-------------|
| H | 6.06186400  | 0.44179100  | -1.55225000 |
| H | 5.49400700  | 1.44874100  | 0.62401700  |
| H | 3.27464400  | 0.98439800  | 1.68089200  |
| N | 1.96271800  | -1.69191800 | -1.64205600 |
| O | -0.10425500 | -2.35222000 | -0.84872400 |
| C | 0.93945500  | -1.74325200 | -0.74426900 |
| N | 0.59191600  | -0.42139100 | 1.37420100  |
| C | -0.63100000 | -1.12240700 | 1.73384100  |
| H | -1.21740700 | -0.46874800 | 2.38290700  |
| H | -1.22156400 | -1.39963100 | 0.85743100  |
| C | -0.28281900 | -2.37132100 | 2.51428600  |
| F | 0.53521500  | -3.18529500 | 1.83117400  |
| F | -1.39180700 | -3.05748200 | 2.80839200  |
| F | 0.33439100  | -2.07509900 | 3.66625900  |
| C | 1.97861600  | -2.41087800 | -2.90042200 |
| H | 1.02481900  | -2.92857700 | -3.00185900 |
| H | 2.10519700  | -1.70877300 | -3.72811200 |
| H | 2.79346500  | -3.13960100 | -2.90964000 |

### Compound INT4+INT5

0 1

|   |             |             |             |
|---|-------------|-------------|-------------|
| C | -3.17625100 | 0.56247100  | -0.25496000 |
| C | -3.07472900 | -0.18345800 | -1.45472500 |
| C | -4.15936500 | -0.85912600 | -2.00436600 |
| C | -5.37575500 | -0.79432800 | -1.32188100 |
| C | -5.49472900 | -0.06739800 | -0.12972600 |
| C | -4.40559400 | 0.61794700  | 0.40667900  |
| C | -1.88621700 | 1.15900600  | -0.00846500 |
| H | -4.06085300 | -1.42089700 | -2.92862500 |
| H | -6.24027100 | -1.31419000 | -1.72318600 |
| H | -6.45210900 | -0.03497800 | 0.38212200  |
| H | -4.50323000 | 1.18792200  | 1.32672300  |
| N | -1.77248100 | -0.09644000 | -1.90439300 |
| O | 0.23883000  | 0.81142800  | -1.19289200 |
| C | -1.00357700 | 0.69231200  | -1.04384700 |
| N | -1.66478300 | 1.89849000  | 1.11540000  |
| C | -0.74338600 | 2.73693500  | 1.41557500  |
| H | -0.76575400 | 3.20358600  | 2.39970400  |
| H | 1.28255800  | 0.47133000  | 2.07540300  |
| C | 0.35572800  | 3.27168100  | 0.54562300  |
| F | 1.47982400  | 2.52475400  | 0.55048500  |
| F | 0.72872800  | 4.48606900  | 1.00638700  |
| F | -0.01331500 | 3.44200300  | -0.72941200 |
| C | -1.23994700 | -0.78421200 | -3.05613700 |
| H | -1.73366600 | -0.44735100 | -3.97341900 |

|   |             |             |             |
|---|-------------|-------------|-------------|
| H | -0.17584200 | -0.54840900 | -3.11279200 |
| H | -1.36751200 | -1.86624700 | -2.95571800 |
| C | 2.71048900  | -0.14331400 | -0.09307700 |
| C | 2.95011300  | -0.88127300 | -1.26841000 |
| C | 4.13532800  | -0.74456100 | -1.97293600 |
| C | 5.08278000  | 0.14433000  | -1.45886700 |
| C | 4.86556800  | 0.86606700  | -0.27966700 |
| C | 3.67111000  | 0.72615300  | 0.41768300  |
| C | 1.41165500  | -0.54789600 | 0.37814700  |
| H | 4.32320200  | -1.30603900 | -2.88120400 |
| H | 6.02081400  | 0.27170700  | -1.99033500 |
| H | 5.63163200  | 1.53825400  | 0.08943600  |
| H | 3.48636300  | 1.28324800  | 1.33070300  |
| N | 1.87881300  | -1.72882200 | -1.55033100 |
| O | -0.13995800 | -2.23094100 | -0.53391200 |
| C | 0.89902000  | -1.61065800 | -0.60402200 |
| N | 0.83335900  | -0.23955600 | 1.49761600  |
| C | -0.37503400 | -0.84626000 | 2.04292800  |
| H | -0.89524300 | -0.10198100 | 2.64729500  |
| H | -1.01949500 | -1.20169600 | 1.24174200  |
| C | 0.01433700  | -2.01883400 | 2.91707100  |
| F | 0.69496300  | -2.93998800 | 2.21965300  |
| F | -1.07138300 | -2.60465600 | 3.42798100  |
| F | 0.79840200  | -1.63817800 | 3.93617900  |
| C | 1.81152200  | -2.63376000 | -2.68011600 |
| H | 0.88048500  | -3.19503700 | -2.60243000 |
| H | 1.82358900  | -2.07320400 | -3.61862200 |
| H | 2.65665400  | -3.32660800 | -2.65689300 |

## D-TS2

0 1

|   |            |             |             |
|---|------------|-------------|-------------|
| C | 2.90651400 | -0.27722000 | 0.35152700  |
| C | 3.50553200 | -1.35468100 | -0.34512200 |
| C | 4.80339400 | -1.28216000 | -0.82849300 |
| C | 5.50972800 | -0.09134200 | -0.61794700 |
| C | 4.93122300 | 0.98170400  | 0.06257200  |
| C | 3.62898700 | 0.89358900  | 0.56482800  |
| C | 1.58248100 | -0.71506300 | 0.71545000  |
| H | 5.25317000 | -2.11627700 | -1.35839600 |
| H | 6.52577800 | -0.00608600 | -0.99074200 |
| H | 5.50203800 | 1.89262500  | 0.21403100  |
| H | 3.18580100 | 1.72114000  | 1.11109400  |
| N | 2.59026100 | -2.39461000 | -0.43949400 |
| O | 0.36062000 | -2.73561800 | 0.12413400  |
| C | 1.37782600 | -2.04721700 | 0.15753500  |

|   |             |             |             |
|---|-------------|-------------|-------------|
| N | 0.61990800  | 0.11304500  | 1.14196800  |
| C | -0.57542400 | -0.08976100 | 1.62988100  |
| H | -1.19023000 | 0.78665400  | 1.80788300  |
| H | -1.57808400 | 2.84681200  | -0.00258400 |
| C | -1.10393500 | -1.35003300 | 2.23492500  |
| F | -1.92863900 | -2.04302900 | 1.43294200  |
| F | -1.84800700 | -1.01703000 | 3.31403100  |
| F | -0.14430500 | -2.17253400 | 2.66804500  |
| C | 2.80045400  | -3.62293100 | -1.16692200 |
| H | 3.62534600  | -4.19739800 | -0.73438900 |
| H | 1.88077500  | -4.20535200 | -1.09919800 |
| H | 3.02204900  | -3.41981600 | -2.21956100 |
| C | -3.03507400 | 0.75381000  | -0.71105200 |
| C | -3.16964900 | -0.57876800 | -1.15267600 |
| C | -4.38899100 | -1.23611200 | -1.09234300 |
| C | -5.47753300 | -0.52316500 | -0.58379200 |
| C | -5.35624800 | 0.79955400  | -0.14558600 |
| C | -4.12646700 | 1.45087300  | -0.20125000 |
| C | -1.63448500 | 1.07316000  | -0.86155600 |
| H | -4.49295700 | -2.26309800 | -1.42513800 |
| H | -6.44423700 | -1.01375000 | -0.52688200 |
| H | -6.22489100 | 1.31952500  | 0.24299700  |
| H | -4.01868900 | 2.47681900  | 0.13937300  |
| N | -1.94661600 | -1.07033100 | -1.60560400 |
| O | 0.20525600  | -0.21330400 | -1.82108000 |
| C | -0.96129500 | -0.12296400 | -1.48077200 |
| N | -0.99939500 | 2.13896800  | -0.46518500 |
| C | 0.39278000  | 2.30119800  | -0.33163000 |
| H | 0.70269600  | 1.26320200  | 0.68430200  |
| H | 0.96271900  | 1.89891500  | -1.16613600 |
| C | 0.74647200  | 3.70521100  | 0.00486400  |
| F | 0.60328300  | 4.57679900  | -1.01782600 |
| F | 2.02287100  | 3.79794700  | 0.40314300  |
| F | -0.03154800 | 4.18032300  | 1.00076400  |
| C | -1.72146100 | -2.42254200 | -2.06877000 |
| H | -0.66209100 | -2.52012900 | -2.30172700 |
| H | -1.97210800 | -3.13053800 | -1.27529500 |
| H | -2.32508100 | -2.62450100 | -2.95778800 |

**Path E**

**E-TS1**

0 1

|   |             |            |             |
|---|-------------|------------|-------------|
| C | -1.32005700 | 2.06397900 | -0.93434400 |
| C | 0.05214000  | 2.15225000 | -0.62630500 |
| C | 0.55929600  | 3.30514000 | -0.04122900 |

|   |             |             |             |
|---|-------------|-------------|-------------|
| C | -0.31408700 | 4.36644300  | 0.21752400  |
| C | -1.67002300 | 4.26540400  | -0.09930200 |
| C | -2.19853000 | 3.10654500  | -0.68005400 |
| C | -0.45169300 | 0.04083000  | -1.55884100 |
| H | 1.61459900  | 3.37200700  | 0.20791300  |
| H | 0.06542600  | 5.27716300  | 0.66935800  |
| H | -2.33223300 | 5.09976800  | 0.10950100  |
| H | -3.25423300 | 3.02766000  | -0.91904100 |
| N | -1.59588000 | 0.80710000  | -1.48350700 |
| C | -2.90953100 | 0.33019500  | -1.85375500 |
| H | -3.58103900 | 0.34282200  | -0.98898100 |
| H | -3.33762700 | 0.94774900  | -2.64844600 |
| H | -2.79914900 | -0.69463700 | -2.21172000 |
| O | -0.40005700 | -1.10774600 | -1.99276300 |
| C | 1.19871500  | 0.46586800  | 2.32692500  |
| C | 1.06381400  | 1.66785100  | 2.89313000  |
| C | 2.26566100  | -0.81796700 | -0.75020300 |
| H | 1.94197200  | 2.22312600  | 3.20594900  |
| C | 3.71160100  | -0.98907600 | -0.46953300 |
| F | 4.03252300  | -2.29388100 | -0.35965100 |
| F | 4.53795800  | -0.48448800 | -1.42064700 |
| F | 4.09231900  | -0.39072800 | 0.68091700  |
| C | 0.64837900  | 0.86500500  | -0.97275900 |
| N | 1.84470900  | 0.47591500  | -0.65450500 |
| C | 0.07135100  | -0.33926000 | 1.85027100  |
| C | -1.27439600 | -0.07546000 | 2.14252800  |
| C | -0.54540300 | -2.19954700 | 0.54303600  |
| C | -2.26107300 | -0.88754300 | 1.61767700  |
| H | -1.53799000 | 0.76582400  | 2.77078500  |
| C | -1.87454300 | -1.96738500 | 0.82644400  |
| H | -0.21343900 | -2.98049200 | -0.13032000 |
| H | -3.31108800 | -0.69830900 | 1.80881800  |
| N | 0.38312200  | -1.39493100 | 1.06375700  |
| N | -2.88199300 | -2.81805500 | 0.20402200  |
| O | -4.05029200 | -2.51528600 | 0.36687000  |
| O | -2.49348900 | -3.76971600 | -0.44891800 |
| H | 0.09983300  | 2.14027800  | 3.05689700  |
| H | 2.18441400  | 0.04475900  | 2.15147900  |
| H | 1.87996200  | -1.48114200 | -1.52492200 |
| H | 1.40667000  | -1.33255400 | 0.44002800  |

### E-TS1'

O 1

|   |             |             |            |
|---|-------------|-------------|------------|
| C | -2.35738500 | -0.76990600 | 0.99189600 |
| C | -1.46532000 | -1.69387400 | 0.41602100 |



|   |             |             |             |
|---|-------------|-------------|-------------|
| C | -1.95390300 | -2.74861400 | -0.34236300 |
| C | -3.33593800 | -2.86801500 | -0.51221700 |
| C | -4.20703800 | -1.93939500 | 0.06098700  |
| C | -3.73031600 | -0.86901800 | 0.82499800  |
| C | -0.27432500 | 0.00788600  | 1.54810800  |
| H | -1.26843400 | -3.45970000 | -0.79469700 |
| H | -3.73687000 | -3.68745900 | -1.10032200 |
| H | -5.27712200 | -2.04641600 | -0.08807500 |
| H | -4.40692100 | -0.14167100 | 1.26245600  |
| N | -1.63499600 | 0.21814700  | 1.67052700  |
| C | -2.21681100 | 1.39236000  | 2.27975400  |
| H | -1.39782700 | 2.02008900  | 2.63314700  |
| H | -2.80984600 | 1.94620600  | 1.54341200  |
| H | -2.85667100 | 1.11943300  | 3.12369800  |
| O | 0.59507900  | 0.75085800  | 1.99328900  |
| C | 3.01984200  | 2.33797500  | 0.00488700  |
| C | 3.51182200  | 3.38665100  | 0.66735800  |
| C | 2.19264300  | -1.09963700 | 0.33452300  |
| H | 4.55784200  | 3.40667200  | 0.95436500  |
| C | 3.32995400  | -1.89622600 | -0.18717600 |
| F | 4.43848700  | -1.12981700 | -0.29234700 |
| F | 3.68835600  | -2.95014200 | 0.58914700  |
| F | 3.08729900  | -2.41301900 | -1.40625700 |
| C | -0.11331600 | -1.22935800 | 0.72499800  |
| N | 0.98018400  | -1.70298100 | 0.20667600  |
| C | 1.62430900  | 2.21269300  | -0.42380600 |
| C | 0.64027000  | 3.19328800  | -0.27220500 |
| C | 0.05782700  | 0.73983600  | -1.39607600 |
| C | -0.67073700 | 2.90314100  | -0.61183500 |
| H | 0.89333700  | 4.16233900  | 0.13969200  |
| C | -0.94740700 | 1.66489400  | -1.18153300 |
| H | -0.11325800 | -0.22673500 | -1.85659900 |
| H | -1.46769600 | 3.62025000  | -0.44947600 |
| N | 1.29940500  | 1.02885400  | -0.99251500 |
| N | -2.32128900 | 1.28614400  | -1.49891000 |
| O | -3.21173600 | 2.00337600  | -1.07622300 |
| O | -2.49111100 | 0.27634800  | -2.15529900 |
| H | 2.90832100  | 4.24543000  | 0.94547000  |
| H | 3.65816200  | 1.49440900  | -0.24630500 |
| H | 2.43533600  | -0.49918500 | 1.21227900  |
| H | 1.92834700  | 0.07923200  | -0.64642300 |

### Compound INT6+INT7

0 1

|   |             |             |             |
|---|-------------|-------------|-------------|
| C | 3.63035200  | -1.09916200 | -0.27724400 |
| C | 2.26653500  | -0.90742000 | 0.07413300  |
| C | 1.52664200  | -2.01363200 | 0.49608400  |
| C | 2.13797200  | -3.26941800 | 0.55066100  |
| C | 3.47789000  | -3.43484100 | 0.19387000  |
| C | 4.24489700  | -2.34204000 | -0.22456600 |
| C | 3.21894300  | 1.13620000  | -0.55521500 |
| H | 0.48584200  | -1.90756000 | 0.78861500  |
| H | 1.55997700  | -4.12820000 | 0.87819700  |
| H | 3.93351000  | -4.41873300 | 0.24384200  |
| H | 5.28891600  | -2.45979100 | -0.49917100 |
| N | 4.17424700  | 0.12021600  | -0.64951100 |
| C | 5.53916100  | 0.33578700  | -1.06178900 |
| H | 6.23857000  | 0.05442100  | -0.26800300 |
| H | 5.77492700  | -0.24204500 | -1.96112300 |
| H | 5.65048500  | 1.39887600  | -1.27863900 |
| O | 3.44424300  | 2.32270900  | -0.82768200 |
| C | -1.23453100 | -0.26783700 | 2.74674400  |
| C | -1.54857300 | -0.68919100 | 3.97347200  |
| C | 0.61952600  | 2.40256800  | -0.05693500 |
| H | -0.89879600 | -0.45607300 | 4.81012500  |
| C | -0.75863200 | 2.90914300  | 0.16836500  |
| F | -1.63161200 | 2.55912200  | -0.81091100 |
| F | -1.31405700 | 2.43814700  | 1.31010400  |
| F | -0.78088800 | 4.24669200  | 0.23742100  |
| C | 1.99740600  | 0.49973400  | -0.10411100 |
| N | 0.81648100  | 1.12639500  | 0.08938300  |
| C | -2.04655800 | -0.54564100 | 1.56114000  |
| C | -3.32413700 | -1.11582200 | 1.56747900  |
| C | -2.09497800 | -0.41333000 | -0.80395800 |
| C | -3.98168300 | -1.34470600 | 0.37314100  |
| H | -3.79927700 | -1.36782900 | 2.50685600  |
| C | -3.34624900 | -0.98849900 | -0.81390900 |
| H | -1.56205000 | -0.10511200 | -1.69612900 |
| H | -4.97170400 | -1.78546100 | 0.35170900  |
| N | -1.49564200 | -0.21604200 | 0.37187300  |
| N | -4.00791700 | -1.20677200 | -2.09877600 |
| O | -5.10228400 | -1.73658200 | -2.08114400 |
| O | -3.42146100 | -0.84363500 | -3.10158500 |
| H | -2.43751300 | -1.27497100 | 4.18735600  |
| H | -0.32418900 | 0.30006300  | 2.57329500  |
| H | 1.38563300  | 3.10767800  | -0.35809700 |
| H | -0.50340700 | 0.27121200  | 0.33997300  |

**E-TS2**

0 1

|   |             |             |             |
|---|-------------|-------------|-------------|
| C | 3.56868900  | -1.12554900 | -0.22073900 |
| C | 2.20382100  | -0.91316700 | 0.11325600  |
| C | 1.45534100  | -1.99809300 | 0.57380000  |
| C | 2.05989000  | -3.25354100 | 0.68137600  |
| C | 3.40082200  | -3.43978200 | 0.34001000  |
| C | 4.17625900  | -2.36846100 | -0.11542300 |
| C | 3.17998400  | 1.09981000  | -0.58591100 |
| H | 0.41424800  | -1.87741100 | 0.85667700  |
| H | 1.47501800  | -4.09528300 | 1.03920200  |
| H | 3.85091900  | -4.42316000 | 0.43176800  |
| H | 5.22146200  | -2.50165500 | -0.37781400 |
| N | 4.12565000  | 0.07480500  | -0.63508700 |
| C | 5.49606400  | 0.26334800  | -1.04402400 |
| H | 5.73299700  | -0.35111600 | -1.91823000 |
| H | 5.61874300  | 1.31628500  | -1.30038700 |
| H | 6.18567200  | 0.00646700  | -0.23369300 |
| O | 3.41234900  | 2.27412600  | -0.89872300 |
| C | -1.22568700 | -0.09644000 | 2.75814500  |
| C | -1.60116800 | -0.35483600 | 4.01222400  |
| C | 0.59306100  | 2.41847300  | -0.15353000 |
| H | -0.96559400 | -0.06130200 | 4.84075400  |
| C | -0.77952900 | 2.95013200  | 0.05006700  |
| F | -1.33466000 | 2.54222500  | 1.21489000  |
| F | -0.78068200 | 4.28901100  | 0.05518700  |
| F | -1.65715400 | 2.56481600  | -0.90933800 |
| C | 1.94959600  | 0.48925400  | -0.12095700 |
| N | 0.77952500  | 1.14433600  | 0.03798700  |
| C | -2.00894200 | -0.45753300 | 1.57315600  |
| C | -3.26146600 | -1.08299500 | 1.59366500  |
| C | -2.02936100 | -0.43474900 | -0.78534600 |
| C | -3.89488300 | -1.39100700 | 0.40415900  |
| H | -3.73355700 | -1.32563900 | 2.53720400  |
| C | -3.25851600 | -1.05936100 | -0.78862400 |
| H | -1.50012400 | -0.15185900 | -1.68877100 |
| H | -4.86307200 | -1.87784400 | 0.39090800  |
| N | -1.44711900 | -0.15861500 | 0.38190400  |
| N | -3.88803100 | -1.36751800 | -2.07030500 |
| O | -4.95047700 | -1.95943300 | -2.04533500 |
| O | -3.30920500 | -1.01284300 | -3.08106900 |
| H | -2.53136700 | -0.85736700 | 4.25942500  |
| H | -0.28241600 | 0.40661400  | 2.56151600  |
| H | 1.37386200  | 3.09807500  | -0.47156500 |
| H | -0.39968300 | 0.39186500  | 0.31404000  |

## Compound INT3+2a

0 1

|   |             |             |             |
|---|-------------|-------------|-------------|
| C | 1.22361200  | 1.61987700  | -0.79951600 |
| C | 0.36595400  | 0.61114500  | -1.30105500 |
| C | 0.87153900  | -0.35781400 | -2.16500200 |
| C | 2.22382200  | -0.31137800 | -2.50926900 |
| C | 3.05757200  | 0.69164800  | -2.00749200 |
| C | 2.56658900  | 1.67596500  | -1.14416200 |
| C | -0.81391100 | 2.03253900  | 0.16045300  |
| H | 0.22781900  | -1.14172400 | -2.55442500 |
| H | 2.63193600  | -1.06566500 | -3.17429300 |
| H | 4.10728400  | 0.70477800  | -2.28399200 |
| H | 3.21605500  | 2.45009400  | -0.74700900 |
| N | 0.50855700  | 2.44814600  | 0.05854800  |
| C | 1.06718900  | 3.54724700  | 0.80947100  |
| H | 1.90601200  | 3.20455400  | 1.42419700  |
| H | 1.41565000  | 4.34158200  | 0.14260100  |
| H | 0.28099000  | 3.93865700  | 1.45614000  |
| O | -1.68176900 | 2.56981000  | 0.85224900  |
| C | -1.12064400 | -0.40497900 | 2.42515600  |
| C | -2.21854100 | -1.11867900 | 2.16270100  |
| C | -3.21529800 | 0.31368900  | -0.28516900 |
| C | -4.29204900 | -0.66197500 | -0.58900900 |
| F | -5.31767700 | -0.09723000 | -1.24761700 |
| F | -3.84101000 | -1.67613100 | -1.34769500 |
| F | -4.81486900 | -1.19681500 | 0.52714800  |
| C | -0.91584700 | 0.86691100  | -0.70138500 |
| N | -2.03812400 | 0.13800300  | -0.83410100 |
| C | 0.20708400  | -0.69687300 | 1.86311200  |
| C | 1.29158400  | 0.12838100  | 2.19774000  |
| C | 1.51838300  | -1.99563400 | 0.49704200  |
| C | 2.53365700  | -0.12421200 | 1.64048700  |
| H | 1.14591900  | 0.96167200  | 2.87729600  |
| C | 2.63231900  | -1.20546200 | 0.77572500  |
| H | 1.60449500  | -2.83887900 | -0.18156900 |
| H | 3.39957500  | 0.49158300  | 1.85561200  |
| N | 0.33015600  | -1.74826800 | 1.02999100  |
| N | 3.89839700  | -1.50456100 | 0.12920000  |
| O | 4.84886500  | -0.77726800 | 0.36901800  |
| O | 3.94691700  | -2.46817200 | -0.61920600 |
| H | -2.18674200 | -1.98602800 | 1.50887700  |
| H | -1.17151900 | 0.46333200  | 3.07739400  |
| H | -3.40087200 | 1.16420100  | 0.35484700  |
| H | -3.17259400 | -0.85759700 | 2.60881400  |

|               |             |             |             |
|---------------|-------------|-------------|-------------|
| H             | -1.94509100 | -0.68955500 | -1.43192300 |
| <b>E- TS3</b> |             |             |             |
| 0 1           |             |             |             |
| C             | -1.18017600 | 1.73012800  | 0.77077000  |
| C             | -0.38643300 | 0.67032000  | 1.26378400  |
| C             | -0.95169500 | -0.31058900 | 2.07753400  |
| C             | -2.30948500 | -0.22470300 | 2.37870000  |
| C             | -3.08716400 | 0.82251600  | 1.87213900  |
| C             | -2.53293800 | 1.82287400  | 1.06807800  |
| C             | 0.91016900  | 2.11016200  | -0.08803500 |
| H             | -0.34719100 | -1.12982300 | 2.45775900  |
| H             | -2.77117600 | -0.98315700 | 3.00219400  |
| H             | -4.14542400 | 0.86476000  | 2.11095000  |
| H             | -3.14040500 | 2.63366500  | 0.67862600  |
| N             | -0.39980600 | 2.56356000  | -0.02529400 |
| C             | -0.87075200 | 3.76023800  | -0.68456900 |
| H             | -1.70799700 | 3.52394300  | -1.34795600 |
| H             | -1.19298500 | 4.50708400  | 0.04707100  |
| H             | -0.04377300 | 4.16235100  | -1.27056100 |
| O             | 1.83666800  | 2.68200400  | -0.65724900 |
| C             | 1.16619500  | -0.11974100 | -2.08361300 |
| C             | 2.32972200  | -0.78674700 | -1.80303000 |
| C             | 3.07511100  | 0.07090000  | 0.07307700  |
| C             | 4.16225500  | -0.86721900 | 0.47910000  |
| F             | 4.94693800  | -0.36590900 | 1.44917800  |
| F             | 3.65620200  | -2.02198300 | 0.94842800  |
| F             | 4.96126000  | -1.15645500 | -0.55418700 |
| C             | 0.91522600  | 0.85866200  | 0.68832600  |
| N             | 1.97018500  | 0.04987000  | 0.82674300  |
| C             | -0.15471600 | -0.56766400 | -1.70228700 |
| C             | -1.28343500 | 0.19003900  | -2.09168600 |
| C             | -1.47312600 | -2.03627700 | -0.52220700 |
| C             | -2.53259000 | -0.16852800 | -1.63498700 |
| H             | -1.14895800 | 1.06668200  | -2.71691000 |
| C             | -2.61955000 | -1.29638800 | -0.81988500 |
| H             | -1.55056400 | -2.92611400 | 0.09624300  |
| H             | -3.42046400 | 0.40494100  | -1.87594100 |
| N             | -0.27040700 | -1.69230300 | -0.95415500 |
| N             | -3.88172200 | -1.67100200 | -0.23260400 |
| O             | -4.87234100 | -1.01326600 | -0.52277500 |
| O             | -3.90408200 | -2.62717500 | 0.53186700  |
| H             | 2.28777000  | -1.79727300 | -1.40465600 |
| H             | 1.20883700  | 0.81690300  | -2.63284400 |
| H             | 3.36376800  | 1.00984700  | -0.38007500 |

|   |            |             |             |
|---|------------|-------------|-------------|
| H | 3.24322700 | -0.49866700 | -2.31309000 |
| H | 1.81631400 | -0.78729600 | 1.39358100  |

### Analysis of of the favored path E

#### NBO

#### 1a

Natural Population

| Atom      | No | Natural Charge | Core     | Valence  | Rydberg | Total     |
|-----------|----|----------------|----------|----------|---------|-----------|
| C         | 1  | -0.12589       | 1.99898  | 4.11159  | 0.01532 | 6.12589   |
| C         | 2  | 0.19503        | 1.99900  | 3.78938  | 0.01659 | 5.80497   |
| C         | 3  | -0.28953       | 1.99903  | 4.27801  | 0.01249 | 6.28953   |
| C         | 4  | -0.20789       | 1.99917  | 4.19519  | 0.01353 | 6.20789   |
| C         | 5  | -0.26783       | 1.99915  | 4.25529  | 0.01339 | 6.26783   |
| C         | 6  | -0.18120       | 1.99906  | 4.16885  | 0.01328 | 6.18120   |
| C         | 7  | 0.20307        | 1.99911  | 3.77274  | 0.02508 | 5.79693   |
| H         | 8  | 0.25508        | 0.00000  | 0.74369  | 0.00123 | 0.74492   |
| H         | 9  | 0.25296        | 0.00000  | 0.74591  | 0.00114 | 0.74704   |
| H         | 10 | 0.25422        | 0.00000  | 0.74467  | 0.00111 | 0.74578   |
| H         | 11 | 0.26791        | 0.00000  | 0.73065  | 0.00144 | 0.73209   |
| N         | 12 | -0.46599       | 1.99925  | 5.45532  | 0.01142 | 7.46599   |
| O         | 13 | -0.59769       | 1.99980  | 6.57747  | 0.02043 | 8.59769   |
| C         | 14 | 0.67495        | 1.99932  | 3.28520  | 0.04052 | 5.32505   |
| N         | 15 | -0.38869       | 1.99933  | 5.36448  | 0.02488 | 7.38869   |
| C         | 16 | -0.41156       | 1.99917  | 4.39573  | 0.01667 | 6.41156   |
| H         | 17 | 0.27519        | 0.00000  | 0.72217  | 0.00264 | 0.72481   |
| H         | 18 | 0.27521        | 0.00000  | 0.72214  | 0.00265 | 0.72479   |
| C         | 19 | 1.15631        | 1.99919  | 2.77253  | 0.07197 | 4.84369   |
| F         | 20 | -0.37637       | 1.99992  | 7.36952  | 0.00692 | 9.37637   |
| F         | 21 | -0.37868       | 1.99992  | 7.37214  | 0.00661 | 9.37868   |
| F         | 22 | -0.37642       | 1.99992  | 7.36957  | 0.00692 | 9.37642   |
| C         | 23 | -0.49733       | 1.99950  | 4.48556  | 0.01227 | 6.49733   |
| H         | 24 | 0.24124        | 0.00000  | 0.75732  | 0.00143 | 0.75876   |
| H         | 25 | 0.27263        | 0.00000  | 0.72526  | 0.00211 | 0.72737   |
| H         | 26 | 0.24125        | 0.00000  | 0.75731  | 0.00143 | 0.75875   |
| * Total * |    | 0.00000        | 33.98881 | 89.66771 | 0.34348 | 124.00000 |

#### 2a

Summary of Natural Population Analysis:

| Natural Population |    |                |      |         |         |       |
|--------------------|----|----------------|------|---------|---------|-------|
| Atom               | No | Natural Charge | Core | Valence | Rydberg | Total |

|           |    |          |          |          |         |          |
|-----------|----|----------|----------|----------|---------|----------|
| C         | 1  | 0.20798  | 1.99908  | 3.77123  | 0.02171 | 5.79202  |
| C         | 2  | -0.26444 | 1.99906  | 4.25342  | 0.01195 | 6.26444  |
| C         | 3  | -0.18334 | 1.99905  | 4.16915  | 0.01513 | 6.18334  |
| C         | 4  | -0.00126 | 1.99875  | 3.98432  | 0.01819 | 6.00126  |
| C         | 5  | 0.05507  | 1.99914  | 3.92332  | 0.02246 | 5.94493  |
| N         | 6  | -0.45155 | 1.99942  | 5.42973  | 0.02241 | 7.45155  |
| H         | 7  | 0.28779  | 0.00000  | 0.71061  | 0.00160 | 0.71221  |
| H         | 8  | 0.26024  | 0.00000  | 0.73854  | 0.00122 | 0.73976  |
| H         | 9  | 0.26818  | 0.00000  | 0.73007  | 0.00175 | 0.73182  |
| N         | 10 | 0.54663  | 1.99955  | 4.39974  | 0.05409 | 6.45337  |
| O         | 11 | -0.39538 | 1.99982  | 6.37878  | 0.01678 | 8.39538  |
| O         | 12 | -0.39804 | 1.99982  | 6.38137  | 0.01685 | 8.39804  |
| C         | 13 | -0.28499 | 1.99911  | 4.27101  | 0.01487 | 6.28499  |
| H         | 14 | 0.24038  | 0.00000  | 0.75830  | 0.00132 | 0.75962  |
| C         | 15 | -0.36318 | 1.99917  | 4.35329  | 0.01072 | 6.36318  |
| H         | 16 | 0.24478  | 0.00000  | 0.75376  | 0.00146 | 0.75522  |
| H         | 17 | 0.23112  | 0.00000  | 0.76788  | 0.00100 | 0.76888  |
| * Total * |    | 0.00000  | 21.99197 | 55.77452 | 0.23351 | 78.00000 |

### E-TS1

Summary of Natural Population Analysis:

| Atom | No | Natural Charge | Natural Population |         |         |         |
|------|----|----------------|--------------------|---------|---------|---------|
|      |    |                | Core               | Valence | Rydberg | Total   |
| C    | 1  | 0.17449        | 1.99900            | 3.80969 | 0.01682 | 5.82551 |
| C    | 2  | -0.09511       | 1.99899            | 4.08001 | 0.01611 | 6.09511 |
| C    | 3  | -0.21883       | 1.99906            | 4.20587 | 0.01391 | 6.21883 |
| C    | 4  | -0.27064       | 1.99914            | 4.25806 | 0.01344 | 6.27064 |
| C    | 5  | -0.23832       | 1.99916            | 4.22538 | 0.01377 | 6.23832 |
| C    | 6  | -0.29075       | 1.99903            | 4.27919 | 0.01253 | 6.29075 |
| C    | 7  | 0.65623        | 1.99928            | 3.30251 | 0.04198 | 5.34377 |
| H    | 8  | 0.26099        | 0.00000            | 0.73747 | 0.00153 | 0.73901 |
| H    | 9  | 0.24764        | 0.00000            | 0.75122 | 0.00114 | 0.75236 |
| H    | 10 | 0.24771        | 0.00000            | 0.75113 | 0.00116 | 0.75229 |
| H    | 11 | 0.24999        | 0.00000            | 0.74874 | 0.00126 | 0.75001 |
| N    | 12 | -0.46407       | 1.99924            | 5.45337 | 0.01147 | 7.46407 |
| C    | 13 | -0.49684       | 1.99950            | 4.48494 | 0.01240 | 6.49684 |
| H    | 14 | 0.22882        | 0.00000            | 0.76929 | 0.00189 | 0.77118 |
| H    | 15 | 0.24445        | 0.00000            | 0.75409 | 0.00146 | 0.75555 |
| H    | 16 | 0.26980        | 0.00000            | 0.72783 | 0.00237 | 0.73020 |
| O    | 17 | -0.65250       | 1.99978            | 6.63318 | 0.01954 | 8.65250 |

|   |    |          |         |         |         |         |
|---|----|----------|---------|---------|---------|---------|
| C | 18 | -0.29142 | 1.99910 | 4.27545 | 0.01688 | 6.29142 |
| C | 19 | -0.34339 | 1.99917 | 4.33336 | 0.01086 | 6.34339 |
| C | 20 | -0.44666 | 1.99909 | 4.42245 | 0.02512 | 6.44666 |
| H | 21 | 0.24957  | 0.00000 | 0.74946 | 0.00097 | 0.75043 |
| C | 22 | 1.13422  | 1.99900 | 2.79591 | 0.07087 | 4.86578 |
| F | 23 | -0.38473 | 1.99993 | 7.37841 | 0.00639 | 9.38473 |
| F | 24 | -0.38409 | 1.99993 | 7.37773 | 0.00643 | 9.38409 |
| F | 25 | -0.38990 | 1.99992 | 7.38353 | 0.00645 | 9.38990 |
| C | 26 | 0.05682  | 1.99904 | 3.91746 | 0.02668 | 5.94318 |
| N | 27 | -0.36450 | 1.99935 | 5.34507 | 0.02007 | 7.36450 |
| C | 28 | 0.25798  | 1.99909 | 3.72216 | 0.02077 | 5.74202 |
| C | 29 | -0.25173 | 1.99905 | 4.24033 | 0.01234 | 6.25173 |
| C | 30 | 0.10572  | 1.99910 | 3.87150 | 0.02369 | 5.89428 |
| C | 31 | -0.16076 | 1.99906 | 4.14612 | 0.01558 | 6.16076 |
| H | 32 | 0.27453  | 0.00000 | 0.72429 | 0.00118 | 0.72547 |
| C | 33 | 0.00405  | 1.99873 | 3.97797 | 0.01925 | 5.99595 |
| H | 34 | 0.30615  | 0.00000 | 0.69174 | 0.00212 | 0.69385 |
| H | 35 | 0.29684  | 0.00000 | 0.70155 | 0.00161 | 0.70316 |
| N | 36 | -0.49610 | 1.99932 | 5.48120 | 0.01557 | 7.49610 |
| N | 37 | 0.55563  | 1.99955 | 4.39886 | 0.04596 | 6.44437 |
| O | 38 | -0.39780 | 1.99981 | 6.37416 | 0.02382 | 8.39780 |
| O | 39 | -0.37836 | 1.99982 | 6.35462 | 0.02392 | 8.37836 |
| H | 40 | 0.22503  | 0.00000 | 0.77373 | 0.00124 | 0.77497 |
| H | 41 | 0.27956  | 0.00000 | 0.71768 | 0.00277 | 0.72044 |
| H | 42 | 0.26557  | 0.00000 | 0.73175 | 0.00268 | 0.73443 |
| H | 43 | 0.42470  | 0.00000 | 0.57029 | 0.00501 | 0.57530 |

=====

|           |         |          |           |         |           |
|-----------|---------|----------|-----------|---------|-----------|
| * Total * | 0.00000 | 55.98026 | 145.42874 | 0.59100 | 202.00000 |
|-----------|---------|----------|-----------|---------|-----------|

### Structures of E-TS1-CH<sub>3</sub>

#### 1a-CH<sub>3</sub>

0 1

|   |             |             |             |
|---|-------------|-------------|-------------|
| C | 1.44939300  | 0.31292900  | 0.00001500  |
| C | 0.57078400  | -0.78065100 | -0.00001500 |
| C | 1.05843000  | -2.07761700 | -0.00002700 |
| C | 2.44291800  | -2.26797700 | -0.00001300 |
| C | 3.30576300  | -1.17084500 | 0.00001300  |
| C | 2.82510000  | 0.14339900  | 0.00002700  |
| C | -0.62394400 | 1.28577500  | -0.00002300 |
| H | 0.37326500  | -2.92007100 | -0.00004900 |
| H | 2.85034900  | -3.27325000 | -0.00002400 |
| H | 4.37853300  | -1.33722200 | 0.00002200  |
| H | 3.50134200  | 0.99168300  | 0.00004500  |
| N | 0.72813100  | 1.51574200  | 0.00002600  |



|   |             |             |             |
|---|-------------|-------------|-------------|
| C | 1.33168700  | 2.83039300  | 0.00005300  |
| H | 1.95018600  | 2.96562500  | 0.89184300  |
| H | 1.95000500  | 2.96576700  | -0.89184200 |
| H | 0.52712900  | 3.56610800  | 0.00019000  |
| O | -1.49749800 | 2.13337300  | -0.00008000 |
| C | -3.16651800 | -0.22556900 | -0.00004800 |
| C | -4.28930200 | -1.24825900 | 0.00011800  |
| C | -0.79600300 | -0.23737700 | -0.00002600 |
| N | -1.87187800 | -0.90876000 | -0.00005400 |
| H | -3.23499800 | 0.43122000  | -0.87521000 |
| H | -3.23492800 | 0.43143200  | 0.87494500  |
| H | -5.26163100 | -0.74826100 | 0.00002100  |
| H | -4.23143300 | -1.88720600 | -0.88572800 |
| H | -4.23145200 | -1.88690400 | 0.88618400  |

**E-TS1-CH<sub>3</sub>**

0 1

|   |             |             |             |
|---|-------------|-------------|-------------|
| C | -2.20865200 | -1.39658700 | -0.59667400 |
| C | -2.44936700 | -0.02218000 | -0.38622000 |
| C | -3.56895300 | 0.37572700  | 0.33667700  |
| C | -4.43931200 | -0.60237600 | 0.82762600  |
| C | -4.19041300 | -1.95811500 | 0.60167500  |
| C | -3.06443700 | -2.37758900 | -0.11599900 |
| C | -0.44579400 | -0.31384500 | -1.58270800 |
| H | -3.75675400 | 1.43133900  | 0.51384100  |
| H | -5.31761700 | -0.30574200 | 1.39254200  |
| H | -4.87861900 | -2.70205500 | 0.99090400  |
| H | -2.86571200 | -3.43118000 | -0.28610700 |
| N | -1.02307700 | -1.54789700 | -1.31349300 |
| C | -0.42019600 | -2.81240500 | -1.66175600 |
| H | -0.17920300 | -3.38957800 | -0.76312900 |
| H | -1.08958900 | -3.40275100 | -2.29460700 |
| H | 0.49829500  | -2.59776800 | -2.20920300 |
| O | 0.62871400  | -0.16702600 | -2.17080400 |
| C | -0.43108100 | 1.65663300  | 2.09414600  |
| C | -1.32762300 | 1.17867000  | 2.95910600  |
| C | -0.08075900 | 2.64511000  | -1.39964000 |
| H | -2.18144100 | 1.78040400  | 3.25294100  |
| C | -0.12331800 | 4.15439300  | -1.42475700 |
| C | -1.34960700 | 0.70358700  | -1.00477900 |
| N | -1.18895100 | 2.00688000  | -0.96371500 |
| C | 0.73414000  | 0.89310000  | 1.63139100  |
| C | 1.28009700  | -0.20722000 | 2.30701600  |
| C | 2.35787000  | 0.70855700  | -0.05786600 |
| C | 2.39587400  | -0.84013600 | 1.79077000  |

|   |             |             |             |
|---|-------------|-------------|-------------|
| H | 0.83911800  | -0.54512100 | 3.23677200  |
| C | 2.93722000  | -0.35681000 | 0.60285500  |
| H | 2.71338100  | 1.07744600  | -1.01277800 |
| H | 2.85018900  | -1.68653600 | 2.29311400  |
| N | 1.29824700  | 1.30665400  | 0.47911700  |
| N | 4.11975500  | -0.98548400 | 0.02578500  |
| O | 4.59206300  | -1.94311700 | 0.61091500  |
| O | 4.56168800  | -0.51577300 | -1.00793300 |
| H | -1.25369200 | 0.18199600  | 3.38509800  |
| H | -0.55657500 | 2.64125300  | 1.65195700  |
| H | 0.53516000  | 2.15711100  | -2.16252500 |
| H | 0.71074700  | 2.11255400  | -0.27959700 |
| H | 0.88323300  | 4.57845600  | -1.35523300 |
| H | -0.57479300 | 4.54245500  | -2.34741300 |
| H | -0.71181100 | 4.53289500  | -0.58302700 |

### Origin of diastereoselectivity

#### Structures of paths E-a/b/c/d

##### E-a

##### E-TS3-a

0 1

|   |             |             |             |
|---|-------------|-------------|-------------|
| C | -1.18017600 | 1.73012800  | 0.77077000  |
| C | -0.38643300 | 0.67032000  | 1.26378400  |
| C | -0.95169500 | -0.31058900 | 2.07753400  |
| C | -2.30948500 | -0.22470300 | 2.37870000  |
| C | -3.08716400 | 0.82251600  | 1.87213900  |
| C | -2.53293800 | 1.82287400  | 1.06807800  |
| C | 0.91016900  | 2.11016200  | -0.08803500 |
| H | -0.34719100 | -1.12982300 | 2.45775900  |
| H | -2.77117600 | -0.98315700 | 3.00219400  |
| H | -4.14542400 | 0.86476000  | 2.11095000  |
| H | -3.14040500 | 2.63366500  | 0.67862600  |
| N | -0.39980600 | 2.56356000  | -0.02529400 |
| C | -0.87075200 | 3.76023800  | -0.68456900 |
| H | -1.70799700 | 3.52394300  | -1.34795600 |
| H | -1.19298500 | 4.50708400  | 0.04707100  |
| H | -0.04377300 | 4.16235100  | -1.27056100 |
| O | 1.83666800  | 2.68200400  | -0.65724900 |
| C | 1.16619500  | -0.11974100 | -2.08361300 |
| C | 2.32972200  | -0.78674700 | -1.80303000 |
| C | 3.07511100  | 0.07090000  | 0.07307700  |
| C | 4.16225500  | -0.86721900 | 0.47910000  |
| F | 4.94693800  | -0.36590900 | 1.44917800  |
| F | 3.65620200  | -2.02198300 | 0.94842800  |

|   |             |             |             |
|---|-------------|-------------|-------------|
| F | 4.96126000  | -1.15645500 | -0.55418700 |
| C | 0.91522600  | 0.85866200  | 0.68832600  |
| N | 1.97018500  | 0.04987000  | 0.82674300  |
| C | -0.15471600 | -0.56766400 | -1.70228700 |
| C | -1.28343500 | 0.19003900  | -2.09168600 |
| C | -1.47312600 | -2.03627700 | -0.52220700 |
| C | -2.53259000 | -0.16852800 | -1.63498700 |
| H | -1.14895800 | 1.06668200  | -2.71691000 |
| C | -2.61955000 | -1.29638800 | -0.81988500 |
| H | -1.55056400 | -2.92611400 | 0.09624300  |
| H | -3.42046400 | 0.40494100  | -1.87594100 |
| N | -0.27040700 | -1.69230300 | -0.95415500 |
| N | -3.88172200 | -1.67100200 | -0.23260400 |
| O | -4.87234100 | -1.01326600 | -0.52277500 |
| O | -3.90408200 | -2.62717500 | 0.53186700  |
| H | 2.28777000  | -1.79727300 | -1.40465600 |
| H | 1.20883700  | 0.81690300  | -2.63284400 |
| H | 3.36376800  | 1.00984700  | -0.38007500 |
| H | 3.24322700  | -0.49866700 | -2.31309000 |
| H | 1.81631400  | -0.78729600 | 1.39358100  |

**E-TS3-b**

0 1

|   |             |             |             |
|---|-------------|-------------|-------------|
| C | -1.31781800 | 2.61978500  | -0.42862800 |
| C | -2.03730900 | 1.41554200  | -0.21813900 |
| C | -3.30237000 | 1.46813300  | 0.36450300  |
| C | -3.82712000 | 2.71227200  | 0.72266400  |
| C | -3.10228000 | 3.88507600  | 0.51248200  |
| C | -1.83014600 | 3.85442300  | -0.06896300 |
| C | 0.05236200  | 0.99596800  | -1.25160300 |
| H | -3.87913100 | 0.56830700  | 0.54896200  |
| H | -4.81213200 | 2.76334600  | 1.17470600  |
| H | -3.52816000 | 4.83977400  | 0.80434600  |
| H | -1.26488000 | 4.76563700  | -0.23631300 |
| N | -0.08456000 | 2.34502400  | -1.02613100 |
| C | 0.93398800  | 3.32448200  | -1.33122400 |
| H | 0.56204000  | 4.05790900  | -2.05199200 |
| H | 1.25150600  | 3.84185800  | -0.42100200 |
| H | 1.78340500  | 2.79318400  | -1.76224100 |
| O | 1.00172500  | 0.42001300  | -1.76969900 |
| C | -0.52143700 | -0.33849600 | 1.86930500  |
| C | -1.23876400 | -1.51039300 | 1.88321100  |
| C | -2.11160200 | -1.72672500 | -0.12010100 |
| C | -2.05713100 | -3.18744200 | -0.41428500 |
| F | -2.78703500 | -3.53715400 | -1.48885700 |

|   |             |             |             |
|---|-------------|-------------|-------------|
| F | -0.79707800 | -3.58779100 | -0.65387200 |
| F | -2.52826900 | -3.89650200 | 0.61883700  |
| C | -1.16046200 | 0.37123000  | -0.69704100 |
| N | -1.28027000 | -0.94820100 | -0.82037200 |
| C | 0.84446800  | -0.27985600 | 1.38941300  |
| C | 1.62575500  | 0.88686200  | 1.56782600  |
| C | 2.57372900  | -1.33837700 | 0.29484400  |
| C | 2.91768300  | 0.91725300  | 1.09415300  |
| H | 1.19604800  | 1.74543300  | 2.07371700  |
| C | 3.39813400  | -0.23030100 | 0.45913600  |
| H | 2.94364400  | -2.22008600 | -0.22044400 |
| H | 3.55273700  | 1.78825000  | 1.21038400  |
| N | 1.32709700  | -1.36915800 | 0.74747900  |
| N | 4.74617100  | -0.26131600 | -0.05951100 |
| O | 5.43627800  | 0.74025100  | 0.07038000  |
| O | 5.13446000  | -1.28631200 | -0.60361800 |
| H | -0.70683600 | -2.44972000 | 1.76420800  |
| H | -0.94659600 | 0.57886600  | 2.26423000  |
| H | -3.07968600 | -1.33580200 | 0.16134500  |
| H | -2.18964200 | -1.55069800 | 2.40503100  |
| H | -0.44770900 | -1.38590600 | -1.23198900 |

## E-C

### E-TS3-c

0 1

|   |             |             |             |
|---|-------------|-------------|-------------|
| C | 3.83101700  | -1.20794300 | 0.09873600  |
| C | 3.44144600  | 0.11360300  | -0.20160400 |
| C | 4.30911000  | 0.95879800  | -0.88209500 |
| C | 5.56899300  | 0.47331800  | -1.24074400 |
| C | 5.94090300  | -0.83827500 | -0.93852000 |
| C | 5.07379200  | -1.70413400 | -0.26475200 |
| C | 1.72691100  | -1.00655400 | 0.97286900  |
| H | 4.01571000  | 1.97611100  | -1.12637400 |
| H | 6.26330500  | 1.12160600  | -1.76509600 |
| H | 6.92242300  | -1.19673500 | -1.23232800 |
| H | 5.36267800  | -2.72349800 | -0.02995800 |
| N | 2.80058300  | -1.85353500 | 0.78092200  |
| C | 2.85185500  | -3.21238500 | 1.27179600  |
| H | 3.01438600  | -3.91133700 | 0.44677600  |
| H | 3.65429900  | -3.32857900 | 2.00590400  |
| H | 1.89426800  | -3.42701900 | 1.74673600  |
| O | 0.71207000  | -1.27831800 | 1.61068800  |
| C | -0.44566600 | 0.44847500  | -1.34427800 |
| C | 0.66608900  | -0.34650100 | -1.52799200 |
| C | 0.10753500  | 1.46785800  | 0.68725800  |

|   |             |             |             |
|---|-------------|-------------|-------------|
| C | -0.50898300 | 2.82123900  | 0.76221900  |
| F | -0.49670700 | 3.33885600  | 2.00410100  |
| F | 0.13808300  | 3.69571000  | -0.02825300 |
| F | -1.78782900 | 2.78040800  | 0.37394400  |
| C | 2.07192000  | 0.24269500  | 0.26474300  |
| N | 1.41891300  | 1.40627900  | 0.47395600  |
| C | -1.76386800 | -0.07750000 | -0.95812600 |
| C | -1.91606000 | -1.24669300 | -0.18855100 |
| C | -4.04458700 | 0.20864800  | -1.09737000 |
| C | -3.18615300 | -1.69429900 | 0.11663000  |
| H | -1.04164800 | -1.76888000 | 0.18432200  |
| C | -4.26079200 | -0.94581800 | -0.35448500 |
| H | -4.88559900 | 0.79419600  | -1.45639900 |
| H | -3.35359200 | -2.58849900 | 0.70619500  |
| N | -2.82222000 | 0.63538000  | -1.39272100 |
| N | -5.62189100 | -1.36345300 | -0.06175500 |
| O | -5.77898900 | -2.36361900 | 0.61999000  |
| O | -6.53763500 | -0.69323000 | -0.51283400 |
| H | 0.62602500  | -1.41686800 | -1.34346900 |
| H | -0.48849000 | 1.41729700  | -1.83584500 |
| H | -0.37760500 | 0.65830000  | 1.21547100  |
| H | 1.46866500  | -0.00531100 | -2.17228500 |
| H | 1.87122600  | 2.24590500  | 0.10825400  |

### 3ac

0 1

|   |             |             |             |
|---|-------------|-------------|-------------|
| C | 3.90871100  | -1.10481300 | -0.01273200 |
| C | 3.20076700  | -0.09928600 | -0.67972400 |
| C | 3.81719500  | 0.65338000  | -1.66136700 |
| C | 5.15771600  | 0.38580600  | -1.96995500 |
| C | 5.84798500  | -0.62148100 | -1.29884000 |
| C | 5.23316400  | -1.39006400 | -0.30374900 |
| C | 1.82997900  | -1.17363500 | 0.92618600  |
| H | 3.27180800  | 1.43614800  | -2.18252800 |
| H | 5.66011900  | 0.96418200  | -2.73805800 |
| H | 6.88524800  | -0.81939600 | -1.55077600 |
| H | 5.77139700  | -2.17488300 | 0.21743200  |
| N | 3.07946600  | -1.72447300 | 0.93359500  |
| C | 3.48644500  | -2.81338900 | 1.79472700  |
| H | 3.78953400  | -3.67803100 | 1.19767400  |
| H | 4.32026900  | -2.50460500 | 2.43109700  |
| H | 2.63244200  | -3.08087600 | 2.41676400  |
| O | 0.89642000  | -1.51666400 | 1.63468900  |
| C | -0.47616400 | 0.71917300  | -0.68994500 |
| C | 0.64096300  | -0.25599300 | -1.13844800 |

|   |             |             |             |
|---|-------------|-------------|-------------|
| C | 0.06572900  | 1.27604200  | 0.65407600  |
| C | -0.39811400 | 2.68522500  | 0.92190200  |
| F | 0.00470700  | 3.13079000  | 2.11923200  |
| F | 0.07538400  | 3.54728600  | 0.00268900  |
| F | -1.73681100 | 2.76398200  | 0.88878300  |
| C | 1.80196200  | -0.04442700 | -0.12583800 |
| N | 1.52180600  | 1.21853700  | 0.58228700  |
| C | -1.85217600 | 0.11600300  | -0.57114900 |
| C | -2.07173900 | -1.01744300 | 0.22424900  |
| C | -4.06847300 | 0.23912300  | -1.15760900 |
| C | -3.35095000 | -1.53733500 | 0.31611500  |
| H | -1.24190600 | -1.47257900 | 0.75832400  |
| C | -4.35095400 | -0.88628900 | -0.39510000 |
| H | -4.85618200 | 0.74489200  | -1.70672200 |
| H | -3.57778800 | -2.41233800 | 0.91408500  |
| N | -2.83452600 | 0.73191400  | -1.24345100 |
| N | -5.72046900 | -1.38895800 | -0.34413100 |
| O | -5.93002900 | -2.40420300 | 0.29707500  |
| O | -6.57950400 | -0.76742000 | -0.94651100 |
| H | 0.30596400  | -1.29627400 | -1.15047100 |
| H | -0.54515200 | 1.54573000  | -1.40249900 |
| H | -0.28159500 | 0.65889300  | 1.48935200  |
| H | 0.97938600  | -0.00249800 | -2.14485600 |
| H | 1.84561500  | 1.97668900  | -0.02206600 |

**E-d**

**E-TS3-d**

0 1

|   |            |             |             |
|---|------------|-------------|-------------|
| C | 3.46964100 | -1.47399000 | 0.20407000  |
| C | 3.30922700 | -0.11623000 | -0.14151000 |
| C | 4.33015900 | 0.56278900  | -0.79475900 |
| C | 5.51560500 | -0.12270000 | -1.07537600 |
| C | 5.66164300 | -1.46600700 | -0.72581300 |
| C | 4.63624100 | -2.16695700 | -0.08239800 |
| C | 1.38558300 | -0.92330500 | 0.97227400  |
| H | 4.21030500 | 1.60539000  | -1.07638300 |
| H | 6.32801800 | 0.39396000  | -1.57555300 |
| H | 6.58821200 | -1.98209500 | -0.95684700 |
| H | 4.75061500 | -3.21181800 | 0.18755200  |
| N | 2.31970800 | -1.93476200 | 0.84476300  |
| C | 2.15551900 | -3.25874000 | 1.40112900  |
| H | 2.23531000 | -4.01723700 | 0.61739500  |
| H | 2.91194100 | -3.45172900 | 2.16756700  |
| H | 1.16382500 | -3.30675800 | 1.85175600  |
| O | 0.32926800 | -0.99927100 | 1.58628000  |

|   |             |             |             |
|---|-------------|-------------|-------------|
| C | -0.41871100 | 0.67196100  | -1.45588500 |
| C | 0.70319100  | -0.10921600 | -1.63390900 |
| C | 0.18535800  | 1.74668800  | 0.60706900  |
| C | -0.21807700 | 3.17894300  | 0.62326200  |
| F | -0.12981200 | 3.74406100  | 1.84130300  |
| F | 0.55416200  | 3.91114400  | -0.19931900 |
| F | -1.48980000 | 3.32165800  | 0.22773100  |
| C | 1.95035500  | 0.23540600  | 0.23956200  |
| N | 1.47779800  | 1.48754500  | 0.42944400  |
| C | -1.70991000 | 0.09745900  | -1.06522400 |
| C | -2.86942000 | 0.89829200  | -1.06733100 |
| C | -2.90734900 | -1.73744500 | -0.36196100 |
| C | -4.07962300 | 0.34842800  | -0.69586100 |
| H | -2.80267500 | 1.93892900  | -1.36242500 |
| C | -4.08457600 | -0.99445800 | -0.33064800 |
| H | -2.91919300 | -2.78873500 | -0.09008500 |
| H | -4.99529300 | 0.92806000  | -0.68487100 |
| N | -1.74811500 | -1.20573700 | -0.72232400 |
| N | -5.32353300 | -1.63273300 | 0.07427100  |
| O | -6.34186000 | -0.95871700 | 0.07354200  |
| O | -5.28615900 | -2.81106300 | 0.39497300  |
| H | 0.63272000  | -1.18714800 | -1.52556400 |
| H | -0.45566400 | 1.67267500  | -1.87777800 |
| H | -0.43475100 | 1.02750100  | 1.12234000  |
| H | 1.53415200  | 0.26764500  | -2.22060600 |
| H | 2.06138800  | 2.24631600  | 0.07449300  |

### 3ad

0 1

|   |            |             |             |
|---|------------|-------------|-------------|
| C | 4.05221900 | -0.92920900 | -0.14851300 |
| C | 3.11997100 | -0.06628000 | -0.73599900 |
| C | 3.46863500 | 0.69781200  | -1.83366900 |
| C | 4.76982500 | 0.58922000  | -2.34222500 |
| C | 5.68648100 | -0.27589000 | -1.74891900 |
| C | 5.34378800 | -1.05464200 | -0.63682300 |
| C | 2.16488900 | -1.20901800 | 1.10830400  |
| H | 2.74549700 | 1.36898200  | -2.29095500 |
| H | 5.06318300 | 1.18003800  | -3.20343700 |
| H | 6.69033900 | -0.35277000 | -2.15506000 |
| H | 6.06065400 | -1.72767700 | -0.17799800 |
| N | 3.46993300 | -1.59121200 | 0.94086900  |
| C | 4.15549600 | -2.54403100 | 1.78554000  |
| H | 4.53082000 | -3.38062900 | 1.18944300  |
| H | 4.99208000 | -2.06623100 | 2.30323800  |
| H | 3.43750800 | -2.91365800 | 2.51778900  |

|   |             |             |             |
|---|-------------|-------------|-------------|
| O | 1.40429900  | -1.61443700 | 1.96756400  |
| C | -0.45746400 | 0.52170400  | -0.57193400 |
| C | 0.56861100  | -0.60649700 | -0.78829000 |
| C | 0.01932900  | 1.10190400  | 0.77652100  |
| C | -0.49041100 | 2.49608400  | 1.03859700  |
| F | -0.08352300 | 2.96958300  | 2.22323300  |
| F | -0.06247400 | 3.36209200  | 0.10031600  |
| F | -1.83179300 | 2.53227300  | 1.02734800  |
| C | 1.82465900  | -0.16480400 | 0.02420100  |
| N | 1.47677700  | 1.09562300  | 0.71639200  |
| C | -1.88994000 | 0.05798000  | -0.56577400 |
| C | -2.83414700 | 0.62520800  | -1.42694600 |
| C | -3.45387600 | -1.33749500 | 0.37176900  |
| C | -4.14465500 | 0.17709200  | -1.38123200 |
| H | -2.53780700 | 1.40612000  | -2.11840900 |
| C | -4.43892000 | -0.82007900 | -0.46277800 |
| H | -3.69193000 | -2.11394000 | 1.09201200  |
| H | -4.91453200 | 0.58019900  | -2.02888100 |
| N | -2.19966200 | -0.90234200 | 0.31743600  |
| N | -5.80106800 | -1.33574800 | -0.36444300 |
| O | -6.64910600 | -0.84300900 | -1.08801400 |
| O | -6.01484100 | -2.23037000 | 0.43612800  |
| H | 0.17371500  | -1.54147700 | -0.38187800 |
| H | -0.33015900 | 1.29500000  | -1.33702300 |
| H | -0.32514100 | 0.46138000  | 1.59668700  |
| H | 0.80128700  | -0.75095000 | -1.84416000 |
| H | 1.77300500  | 1.86401100  | 0.11239800  |

### Bond lengths of E-TS3-a/b/c/d

#### E-TS3-a(C2-C5)

# Bond Length (18C, 25C) along IRC

# X-Axis: Intrinsic Reaction Coordinate

# Y-Axis: Bond Length (Angstroms)

| # | X            | Y            |
|---|--------------|--------------|
|   | 0.000000000  | 2.9502379038 |
|   | 0.1675100000 | 2.9397601245 |
|   | 0.3350000000 | 2.9295348561 |
|   | 0.5025000000 | 2.9196654789 |
|   | 0.6700000000 | 2.9102941641 |
|   | 0.8375200000 | 2.9016583795 |
|   | 1.0050500000 | 2.8930448590 |
|   | 1.1725700000 | 2.8844231011 |
|   | 1.3401000000 | 2.8758280155 |
|   | 1.5076300000 | 2.8672024439 |
|   | 1.6751500000 | 2.8584739098 |



|               |               |
|---------------|---------------|
| 1. 8426800000 | 2. 8495548520 |
| 2. 0102000000 | 2. 8403214338 |
| 2. 1777100000 | 2. 8306196988 |
| 2. 3452000000 | 2. 8202295558 |
| 2. 5126600000 | 2. 8088735955 |
| 2. 6800600000 | 2. 7961967122 |
| 2. 8473700000 | 2. 7818425211 |
| 3. 0145900000 | 2. 7656270437 |
| 3. 1818100000 | 2. 7477109216 |
| 3. 3491000000 | 2. 7285016772 |
| 3. 5164600000 | 2. 7083361470 |
| 3. 6838200000 | 2. 6874212607 |
| 3. 8508100000 | 2. 6658369017 |
| 4. 0168000000 | 2. 6436888167 |
| 4. 1834600000 | 2. 6212619580 |
| 4. 3504900000 | 2. 5983291045 |
| 4. 5175600000 | 2. 5751559876 |
| 4. 6844600000 | 2. 5519171595 |
| 4. 8516100000 | 2. 5285501500 |
| 5. 0189000000 | 2. 5051288181 |
| 5. 1862900000 | 2. 4817405324 |
| 5. 3532500000 | 2. 4582504623 |
| 5. 5207100000 | 2. 4346849965 |
| 5. 6881100000 | 2. 4109248077 |
| 5. 8553200000 | 2. 3866700640 |
| 6. 0228300000 | 2. 3623027637 |
| 6. 1903400000 | 2. 3372553164 |
| 6. 3578400000 | 2. 3117889371 |
| 6. 5253100000 | 2. 2857959097 |
| 6. 6927500000 | 2. 2593343593 |
| 6. 8601300000 | 2. 2323424818 |
| 7. 0273200000 | 2. 2048073930 |
| 7. 1948200000 | 2. 1770352051 |
| 7. 3623300000 | 2. 1484527350 |
| 7. 5298100000 | 2. 1196661041 |
| 7. 6972600000 | 2. 0904103318 |
| 7. 8646200000 | 2. 0610730818 |
| 8. 0317400000 | 2. 0312136496 |
| 8. 1992400000 | 2. 0012540234 |
| 8. 3667600000 | 1. 9714383756 |
| 8. 5342600000 | 1. 9416980395 |
| 8. 7017600000 | 1. 9123674826 |
| 8. 8692500000 | 1. 8832371684 |
| 9. 0367300000 | 1. 8548028971 |

|                |               |
|----------------|---------------|
| 9. 2041800000  | 1. 8269027340 |
| 9. 3716000000  | 1. 8002713486 |
| 9. 5389800000  | 1. 7748443101 |
| 9. 7062900000  | 1. 7517141089 |
| 9. 8735000000  | 1. 7308983401 |
| 10. 0403600000 | 1. 7137206487 |
| 10. 2076700000 | 1. 6983727738 |
| 10. 3749800000 | 1. 6901247773 |
| 10. 5422500000 | 1. 6805848484 |
| 10. 7092700000 | 1. 6756974524 |
| 10. 8767100000 | 1. 6711459822 |
| 11. 0440900000 | 1. 6676416805 |
| 11. 2111400000 | 1. 6647194585 |
| 11. 3785600000 | 1. 6623203739 |
| 11. 5456900000 | 1. 6601253756 |
| 11. 7131500000 | 1. 6577895255 |
| 11. 8804600000 | 1. 6569943399 |
| 12. 0472200000 | 1. 6548756006 |
| 12. 2145900000 | 1. 6523569589 |
| 12. 3815500000 | 1. 6519024394 |
| 12. 5488200000 | 1. 6505551489 |
| 12. 7161300000 | 1. 6494876388 |
| 12. 8834000000 | 1. 6484600531 |
| 13. 0506300000 | 1. 6475256856 |
| 13. 2177800000 | 1. 6466731742 |
| 13. 3849100000 | 1. 6458892445 |
| 13. 5519700000 | 1. 6451576848 |
| 13. 7190500000 | 1. 6444640603 |
| 13. 8860900000 | 1. 6437965462 |
| 14. 0530900000 | 1. 6431431935 |
| 14. 2201600000 | 1. 6424872297 |
| 14. 3871900000 | 1. 6418173108 |
| 14. 5543900000 | 1. 6411484926 |
| 14. 7216900000 | 1. 6404937416 |
| 14. 8890800000 | 1. 6381727526 |
| 15. 0557300000 | 1. 6385696641 |
| 15. 2228200000 | 1. 6380934657 |
| 15. 3901200000 | 1. 6378014018 |
| 15. 5575600000 | 1. 6382391914 |
| 15. 7246900000 | 1. 6372637098 |
| 15. 8919600000 | 1. 6367090477 |
| 16. 0593400000 | 1. 6357015470 |
| 16. 2260800000 | 1. 6357173931 |
| 16. 3931100000 | 1. 6353804829 |

16.5602900000 1.6350503644  
16.7275200000 1.6346558550

### E-TS3-a(C1-C3)

# Bond Length (19C, 20C) along IRC

# X-Axis: Intrinsic Reaction Coordinate

# Y-Axis: Bond Length (Angstroms)

| #            | X | Y            |
|--------------|---|--------------|
| 0.0000000000 |   | 2.1933856509 |
| 0.1675100000 |   | 2.1621251073 |
| 0.3350000000 |   | 2.1303984114 |
| 0.5025000000 |   | 2.0982177309 |
| 0.6700000000 |   | 2.0656184848 |
| 0.8375200000 |   | 2.0324895141 |
| 1.0050500000 |   | 1.9994168151 |
| 1.1725700000 |   | 1.9664132267 |
| 1.3401000000 |   | 1.9334735987 |
| 1.5076300000 |   | 1.9006517639 |
| 1.6751500000 |   | 1.8680226734 |
| 1.8426800000 |   | 1.8356808030 |
| 2.0102000000 |   | 1.8037599840 |
| 2.1777100000 |   | 1.7724594454 |
| 2.3452000000 |   | 1.7420729018 |
| 2.5126600000 |   | 1.7130657649 |
| 2.6800600000 |   | 1.6861602951 |
| 2.8473700000 |   | 1.6623890187 |
| 3.0145900000 |   | 1.6428628827 |
| 3.1818100000 |   | 1.6280656232 |
| 3.3491000000 |   | 1.6172375738 |
| 3.5164600000 |   | 1.6093043817 |
| 3.6838200000 |   | 1.6028466427 |
| 3.8508100000 |   | 1.5977562597 |
| 4.0168000000 |   | 1.5943833120 |
| 4.1834600000 |   | 1.5904440041 |
| 4.3504900000 |   | 1.5871604827 |
| 4.5175600000 |   | 1.5842479373 |
| 4.6844600000 |   | 1.5817450073 |
| 4.8516100000 |   | 1.5796848798 |
| 5.0189000000 |   | 1.5778126049 |
| 5.1862900000 |   | 1.5762713234 |
| 5.3532500000 |   | 1.5742745612 |
| 5.5207100000 |   | 1.5725577296 |
| 5.6881100000 |   | 1.5707882578 |
| 5.8553200000 |   | 1.5693719905 |
| 6.0228300000 |   | 1.5680043648 |

|                |               |
|----------------|---------------|
| 6. 1903400000  | 1. 5658517304 |
| 6. 3578400000  | 1. 5651270344 |
| 6. 5253100000  | 1. 5622463392 |
| 6. 6927500000  | 1. 5625387601 |
| 6. 8601300000  | 1. 5583509439 |
| 7. 0273200000  | 1. 5584584627 |
| 7. 1948200000  | 1. 5571842784 |
| 7. 3623300000  | 1. 5547661465 |
| 7. 5298100000  | 1. 5535299987 |
| 7. 6972600000  | 1. 5519265661 |
| 7. 8646200000  | 1. 5496313707 |
| 8. 0317400000  | 1. 5487304824 |
| 8. 1992400000  | 1. 5476811679 |
| 8. 3667600000  | 1. 5451074678 |
| 8. 5342600000  | 1. 5446220922 |
| 8. 7017600000  | 1. 5419233734 |
| 8. 8692500000  | 1. 5419732382 |
| 9. 0367300000  | 1. 5389875516 |
| 9. 2041800000  | 1. 5396577419 |
| 9. 3716000000  | 1. 5362790598 |
| 9. 5389800000  | 1. 5377611601 |
| 9. 7062900000  | 1. 5338240055 |
| 9. 8735000000  | 1. 5365365096 |
| 10. 0403600000 | 1. 5337530817 |
| 10. 2076700000 | 1. 5326015000 |
| 10. 3749800000 | 1. 5342955978 |
| 10. 5422500000 | 1. 5316498897 |
| 10. 7092700000 | 1. 5331293833 |
| 10. 8767100000 | 1. 5341120169 |
| 11. 0440900000 | 1. 5319285551 |
| 11. 2111400000 | 1. 5331899284 |
| 11. 3785600000 | 1. 5345834149 |
| 11. 5456900000 | 1. 5334810115 |
| 11. 7131500000 | 1. 5328675162 |
| 11. 8804600000 | 1. 5346164584 |
| 12. 0472200000 | 1. 5338218093 |
| 12. 2145900000 | 1. 5333467337 |
| 12. 3815500000 | 1. 5340407616 |
| 12. 5488200000 | 1. 5342043401 |
| 12. 7161300000 | 1. 5343382863 |
| 12. 8834000000 | 1. 5344079790 |
| 13. 0506300000 | 1. 5344380032 |
| 13. 2177800000 | 1. 5344261422 |
| 13. 3849100000 | 1. 5343620971 |

|                |               |
|----------------|---------------|
| 13. 5519700000 | 1. 5342421873 |
| 13. 7190500000 | 1. 5340773082 |
| 13. 8860900000 | 1. 5338902158 |
| 14. 0530900000 | 1. 5337001899 |
| 14. 2201600000 | 1. 5335322933 |
| 14. 3871900000 | 1. 5334010239 |
| 14. 5543900000 | 1. 5333141877 |
| 14. 7216900000 | 1. 5332621237 |
| 14. 8890800000 | 1. 5337236431 |
| 15. 0557300000 | 1. 5336681983 |
| 15. 2228200000 | 1. 5335463474 |
| 15. 3901200000 | 1. 5333615864 |
| 15. 5575600000 | 1. 5329635117 |
| 15. 7246900000 | 1. 5328844361 |
| 15. 8919600000 | 1. 5329157485 |
| 16. 0593400000 | 1. 5328058763 |
| 16. 2260800000 | 1. 5327937390 |
| 16. 3931100000 | 1. 5326794608 |
| 16. 5602900000 | 1. 5326497037 |
| 16. 7275200000 | 1. 5326714536 |

### **E-TS3-b(C2-C5)**

# Bond Length (18C, 25C) along IRC

# X-Axis: Intrinsic Reaction Coordinate

# Y-Axis: Bond Length (Angstroms)

| #             | X | Y             |
|---------------|---|---------------|
| 0. 0000000000 |   | 2. 7382833559 |
| 0. 1671900000 |   | 2. 7255679496 |
| 0. 3343600000 |   | 2. 7131024167 |
| 0. 5015400000 |   | 2. 7008620401 |
| 0. 6687300000 |   | 2. 6888896122 |
| 0. 8359300000 |   | 2. 6775825072 |
| 1. 0031300000 |   | 2. 6661750568 |
| 1. 1703300000 |   | 2. 6545016486 |
| 1. 3375400000 |   | 2. 6425582436 |
| 1. 5047400000 |   | 2. 6302523760 |
| 1. 6719400000 |   | 2. 6174771015 |
| 1. 8391400000 |   | 2. 6041100951 |
| 2. 0063300000 |   | 2. 5899942146 |
| 2. 1735100000 |   | 2. 5749302473 |
| 2. 3406800000 |   | 2. 5586802569 |
| 2. 5078300000 |   | 2. 5409611654 |
| 2. 6749400000 |   | 2. 5214666100 |
| 2. 8420200000 |   | 2. 4999502494 |
| 3. 0090700000 |   | 2. 4763527464 |

|                |               |
|----------------|---------------|
| 3. 1761300000  | 2. 4508480641 |
| 3. 3432200000  | 2. 4237868400 |
| 3. 5103400000  | 2. 3955090254 |
| 3. 6774800000  | 2. 3663217704 |
| 3. 8446400000  | 2. 3363559451 |
| 4. 0117600000  | 2. 3059149237 |
| 4. 1787900000  | 2. 2748629564 |
| 4. 3458400000  | 2. 2436431652 |
| 4. 5129800000  | 2. 2119979482 |
| 4. 6801700000  | 2. 1801163448 |
| 4. 8473600000  | 2. 1478698595 |
| 5. 0145600000  | 2. 1155674542 |
| 5. 1817400000  | 2. 0830226482 |
| 5. 3489100000  | 2. 0504625140 |
| 5. 5160500000  | 2. 0177247112 |
| 5. 6831900000  | 1. 9851595598 |
| 5. 8503400000  | 1. 9525395763 |
| 6. 0175100000  | 1. 9201428001 |
| 6. 1847000000  | 1. 8878434530 |
| 6. 3519000000  | 1. 8558629509 |
| 6. 5190900000  | 1. 8242703390 |
| 6. 6862800000  | 1. 7931768346 |
| 6. 8534600000  | 1. 7629999034 |
| 7. 0205800000  | 1. 7336975186 |
| 7. 1875700000  | 1. 7068206097 |
| 7. 3545100000  | 1. 6821061716 |
| 7. 5209000000  | 1. 6609761512 |
| 7. 6874200000  | 1. 6463990850 |
| 7. 8535500000  | 1. 6352393036 |
| 8. 0195400000  | 1. 6291384434 |
| 8. 1863500000  | 1. 6244259348 |
| 8. 3533800000  | 1. 6219749079 |
| 8. 5203300000  | 1. 6188380040 |
| 8. 6870300000  | 1. 6177315965 |
| 8. 8531200000  | 1. 6159335192 |
| 9. 0179700000  | 1. 6141565431 |
| 9. 1830000000  | 1. 6134400239 |
| 9. 3490100000  | 1. 6119791345 |
| 9. 5160500000  | 1. 6112241721 |
| 9. 6830700000  | 1. 6100448848 |
| 9. 8500200000  | 1. 6112283855 |
| 10. 0164600000 | 1. 6082094693 |
| 10. 1828200000 | 1. 6088738804 |
| 10. 3492800000 | 1. 6089228400 |

|                |               |
|----------------|---------------|
| 10. 5163700000 | 1. 6074266831 |
| 10. 6834900000 | 1. 6078897342 |
| 10. 8505500000 | 1. 6063363364 |
| 11. 0174200000 | 1. 6073857298 |
| 11. 1842900000 | 1. 6065732028 |
| 11. 3511700000 | 1. 6064590678 |
| 11. 5183000000 | 1. 6060271116 |
| 11. 6854100000 | 1. 6052247765 |
| 11. 8524200000 | 1. 6052789039 |
| 12. 0191700000 | 1. 6047643478 |
| 12. 1856200000 | 1. 6047746757 |
| 12. 3524900000 | 1. 6040983559 |
| 12. 5195200000 | 1. 6036931154 |
| 12. 6866000000 | 1. 6034835948 |
| 12. 8537600000 | 1. 6038081701 |
| 13. 0209300000 | 1. 6037759252 |
| 13. 1880300000 | 1. 6034423209 |
| 13. 3551600000 | 1. 6026586476 |
| 13. 5220600000 | 1. 6031117684 |
| 13. 6885200000 | 1. 6019497024 |
| 13. 8545600000 | 1. 6026217502 |
| 14. 0206600000 | 1. 6012712874 |
| 14. 1871300000 | 1. 6023531807 |
| 14. 3538900000 | 1. 6017008316 |
| 14. 5207200000 | 1. 6015604510 |
| 14. 6878900000 | 1. 6012709749 |
| 14. 8549900000 | 1. 6010631499 |
| 15. 0220500000 | 1. 6003237359 |
| 15. 1888300000 | 1. 6001837477 |
| 15. 3557300000 | 1. 5997357990 |
| 15. 5226100000 | 1. 5995296930 |
| 15. 6897800000 | 1. 5993968968 |
| 15. 8568700000 | 1. 5989082346 |
| 16. 0240400000 | 1. 5987168720 |
| 16. 1911700000 | 1. 5993414689 |
| 16. 3582100000 | 1. 5981470750 |
| 16. 5252800000 | 1. 5979729116 |
| 16. 6922900000 | 1. 5975921305 |

**E-TS3-b(C1-C3)**

# Bond Length (19C, 20C) along IRC

# X-Axis: Intrinsic Reaction Coordinate

# Y-Axis: Bond Length (Angstroms)

| # | X             | Y             |
|---|---------------|---------------|
|   | 0. 0000000000 | 2. 1958835757 |

|               |               |
|---------------|---------------|
| 0. 1671900000 | 2. 1649813513 |
| 0. 3343600000 | 2. 1336530003 |
| 0. 5015400000 | 2. 1019642015 |
| 0. 6687300000 | 2. 0700179868 |
| 0. 8359300000 | 2. 0375814655 |
| 1. 0031300000 | 2. 0052216873 |
| 1. 1703300000 | 1. 9730396553 |
| 1. 3375400000 | 1. 9410484780 |
| 1. 5047400000 | 1. 9093317562 |
| 1. 6719400000 | 1. 8779865810 |
| 1. 8391400000 | 1. 8471327357 |
| 2. 0063300000 | 1. 8169251123 |
| 2. 1735100000 | 1. 7875770798 |
| 2. 3406800000 | 1. 7593808177 |
| 2. 5078300000 | 1. 7327400032 |
| 2. 6749400000 | 1. 7081822735 |
| 2. 8420200000 | 1. 6863244899 |
| 3. 0090700000 | 1. 6676636229 |
| 3. 1761300000 | 1. 6523902695 |
| 3. 3432200000 | 1. 6401399794 |
| 3. 5103400000 | 1. 6304448356 |
| 3. 6774800000 | 1. 6224072747 |
| 3. 8446400000 | 1. 6160678213 |
| 4. 0117600000 | 1. 6098785441 |
| 4. 1787900000 | 1. 6059285875 |
| 4. 3458400000 | 1. 6005933850 |
| 4. 5129800000 | 1. 5968656868 |
| 4. 6801700000 | 1. 5921309726 |
| 4. 8473600000 | 1. 5891487108 |
| 5. 0145600000 | 1. 5851388630 |
| 5. 1817400000 | 1. 5823627215 |
| 5. 3489100000 | 1. 5787896320 |
| 5. 5160500000 | 1. 5762638483 |
| 5. 6831900000 | 1. 5729851704 |
| 5. 8503400000 | 1. 5705808256 |
| 6. 0175100000 | 1. 5676397348 |
| 6. 1847000000 | 1. 5652527105 |
| 6. 3519000000 | 1. 5626353179 |
| 6. 5190900000 | 1. 5603035494 |
| 6. 6862800000 | 1. 5578908894 |
| 6. 8534600000 | 1. 5556719497 |
| 7. 0205800000 | 1. 5534015568 |
| 7. 1875700000 | 1. 5514791646 |
| 7. 3545100000 | 1. 5494102796 |



|                |               |
|----------------|---------------|
| 7. 5209000000  | 1. 5475500286 |
| 7. 6874200000  | 1. 5471165703 |
| 7. 8535500000  | 1. 5451810619 |
| 8. 0195400000  | 1. 5457915288 |
| 8. 1863500000  | 1. 5462178660 |
| 8. 3533800000  | 1. 5454438176 |
| 8. 5203300000  | 1. 5469037232 |
| 8. 6870300000  | 1. 5448127522 |
| 8. 8531200000  | 1. 5482517421 |
| 9. 0179700000  | 1. 5445902918 |
| 9. 1830000000  | 1. 5468847377 |
| 9. 3490100000  | 1. 5463123235 |
| 9. 5160500000  | 1. 5469485084 |
| 9. 6830700000  | 1. 5465477035 |
| 9. 8500200000  | 1. 5479561013 |
| 10. 0164600000 | 1. 5475118176 |
| 10. 1828200000 | 1. 5477895404 |
| 10. 3492800000 | 1. 5474826567 |
| 10. 5163700000 | 1. 5476830000 |
| 10. 6834900000 | 1. 5475471019 |
| 10. 8505500000 | 1. 5480509501 |
| 11. 0174200000 | 1. 5474819834 |
| 11. 1842900000 | 1. 5476290800 |
| 11. 3511700000 | 1. 5475658400 |
| 11. 5183000000 | 1. 5476060292 |
| 11. 6854100000 | 1. 5478579172 |
| 11. 8524200000 | 1. 5476398127 |
| 12. 0191700000 | 1. 5477176670 |
| 12. 1856200000 | 1. 5475806205 |
| 12. 3524900000 | 1. 5476290008 |
| 12. 5195200000 | 1. 5476211521 |
| 12. 6866000000 | 1. 5475893060 |
| 12. 8537600000 | 1. 5474990334 |
| 13. 0209300000 | 1. 5474346021 |
| 13. 1880300000 | 1. 5473828917 |
| 13. 3551600000 | 1. 5473730425 |
| 13. 5220600000 | 1. 5473791769 |
| 13. 6885200000 | 1. 5472542427 |
| 13. 8545600000 | 1. 5473991071 |
| 14. 0206600000 | 1. 5471704630 |
| 14. 1871300000 | 1. 5473767857 |
| 14. 3538900000 | 1. 5473129059 |
| 14. 5207200000 | 1. 5473275406 |
| 14. 6878900000 | 1. 5473287918 |

|               |              |
|---------------|--------------|
| 14.8549900000 | 1.5472827708 |
| 15.0220500000 | 1.5472145210 |
| 15.1888300000 | 1.5470938311 |
| 15.3557300000 | 1.5471100484 |
| 15.5226100000 | 1.5470892598 |
| 15.6897800000 | 1.5471597246 |
| 15.8568700000 | 1.5470055930 |
| 16.0240400000 | 1.5470629556 |
| 16.1911700000 | 1.5473760432 |
| 16.3582100000 | 1.5469931218 |
| 16.5252800000 | 1.5470687854 |
| 16.6922900000 | 1.5470317079 |

### E-TS3-c(C2-C3)

# Bond Length (18C, 20C) along IRC

# X-Axis: Intrinsic Reaction Coordinate

# Y-Axis: Bond Length (Angstroms)

| #            | X            | Y |
|--------------|--------------|---|
| 0.0000000000 | 2.3392972377 |   |
| 0.3361600000 | 2.2910331245 |   |
| 0.6403900000 | 2.2470525960 |   |
| 0.9760600000 | 2.1959595901 |   |
| 1.3118800000 | 2.1456164870 |   |
| 1.6478400000 | 2.0957640317 |   |
| 1.9838400000 | 2.0465345680 |   |
| 2.3198900000 | 1.9981561988 |   |
| 2.6559600000 | 1.9506509193 |   |
| 2.9920300000 | 1.9040472229 |   |
| 3.3281200000 | 1.8583325920 |   |
| 3.6642000000 | 1.8136723752 |   |
| 4.0002700000 | 1.7703577181 |   |
| 4.3363300000 | 1.7288569605 |   |
| 4.6723500000 | 1.6897321739 |   |
| 5.0082400000 | 1.6543717040 |   |
| 5.3437800000 | 1.6248597973 |   |
| 5.6787900000 | 1.6046350905 |   |
| 6.0132300000 | 1.5911766456 |   |
| 6.3333600000 | 1.5869843362 |   |
| 6.6543200000 | 1.5728946400 |   |
| 6.9826400000 | 1.5838964785 |   |
| 7.2849000000 | 1.5729309890 |   |
| 7.6075400000 | 1.5546990690 |   |
| 7.9250200000 | 1.5852972403 |   |
| 8.2373900000 | 1.5535477281 |   |
| 8.5314400000 | 1.5710391952 |   |

|                |               |
|----------------|---------------|
| 8. 8292900000  | 1. 5625838977 |
| 9. 1471400000  | 1. 5700901523 |
| 9. 4583300000  | 1. 5606710127 |
| 9. 7626800000  | 1. 5574375625 |
| 10. 0704300000 | 1. 5769320942 |
| 10. 3701700000 | 1. 5531512112 |
| 10. 6699700000 | 1. 5689924421 |
| 10. 9690800000 | 1. 5626812647 |
| 11. 2817700000 | 1. 5625864495 |
| 11. 6048100000 | 1. 5641527875 |
| 11. 9245800000 | 1. 5623913907 |
| 12. 2547700000 | 1. 5622618318 |
| 12. 5825500000 | 1. 5629217066 |
| 12. 9110000000 | 1. 5611274248 |
| 13. 2344300000 | 1. 5626339656 |
| 13. 5609000000 | 1. 5607303090 |
| 13. 8857300000 | 1. 5625058255 |
| 14. 2027400000 | 1. 5605864654 |
| 14. 5241700000 | 1. 5610826446 |
| 14. 8450800000 | 1. 5611928617 |
| 15. 1694800000 | 1. 5604415653 |
| 15. 4891600000 | 1. 5597616151 |
| 15. 8087000000 | 1. 5611649402 |
| 16. 1292400000 | 1. 5583008512 |
| 16. 4443500000 | 1. 5612649096 |
| 16. 7480700000 | 1. 5587106712 |
| 17. 0560400000 | 1. 5597286876 |
| 17. 3533900000 | 1. 5592385466 |
| 17. 6665300000 | 1. 5589326219 |
| 17. 9775400000 | 1. 5592871267 |
| 18. 2797800000 | 1. 5582619176 |
| 18. 5876500000 | 1. 5587603383 |
| 18. 9080600000 | 1. 5575764762 |
| 19. 2227000000 | 1. 5594383497 |
| 19. 5239700000 | 1. 5568203918 |
| 19. 8231000000 | 1. 5580113894 |
| 20. 1142700000 | 1. 5583564265 |
| 20. 4202000000 | 1. 5566435958 |
| 20. 7300500000 | 1. 5579282266 |
| 21. 0258400000 | 1. 5573528869 |
| 21. 3162300000 | 1. 5571010121 |
| 21. 6113800000 | 1. 5568234771 |
| 21. 9269800000 | 1. 5569408605 |
| 22. 2253500000 | 1. 5564998220 |

|                |               |
|----------------|---------------|
| 22. 5157300000 | 1. 5571090982 |
| 22. 7934600000 | 1. 5561425753 |
| 23. 0785900000 | 1. 5565291639 |
| 23. 3819400000 | 1. 5562070052 |
| 23. 7017400000 | 1. 5560659657 |
| 23. 9944800000 | 1. 5562985234 |
| 24. 2925300000 | 1. 5553988593 |
| 24. 5879000000 | 1. 5560935530 |
| 24. 8749000000 | 1. 5550922510 |
| 25. 1911100000 | 1. 5555373389 |
| 25. 4786600000 | 1. 5552408583 |
| 25. 7651200000 | 1. 5560449162 |
| 26. 0521900000 | 1. 5556686515 |
| 26. 3757500000 | 1. 5543241456 |
| 26. 6689500000 | 1. 5558793924 |
| 26. 9705900000 | 1. 5540722306 |
| 27. 2589100000 | 1. 5546678758 |
| 27. 5567300000 | 1. 5546250981 |
| 27. 8550000000 | 1. 5547134541 |
| 28. 1671100000 | 1. 5539119229 |
| 28. 4732900000 | 1. 5546352096 |
| 28. 7659100000 | 1. 5537886888 |
| 29. 0505200000 | 1. 5541877483 |
| 29. 3458900000 | 1. 5529762717 |
| 29. 6316000000 | 1. 5534048573 |
| 29. 9347900000 | 1. 5542099870 |
| 30. 2319300000 | 1. 5533323292 |
| 30. 5120800000 | 1. 5538048548 |
| 30. 7888800000 | 1. 5538984829 |
| 31. 1047400000 | 1. 5533616408 |

### **E-TS3-c(C1-C5)**

# Bond Length (19C, 25C) along IRC

# X-Axis: Intrinsic Reaction Coordinate

# Y-Axis: Bond Length (Angstroms)

| #             | X             | Y |
|---------------|---------------|---|
| 0. 0000000000 | 2. 3531705223 |   |
| 0. 3361600000 | 2. 3060749865 |   |
| 0. 6403900000 | 2. 2765263915 |   |
| 0. 9760600000 | 2. 2332740184 |   |
| 1. 3118800000 | 2. 1876339368 |   |
| 1. 6478400000 | 2. 1408427682 |   |
| 1. 9838400000 | 2. 0931270773 |   |
| 2. 3198900000 | 2. 0445364119 |   |
| 2. 6559600000 | 1. 9952892056 |   |

|                |               |
|----------------|---------------|
| 2. 9920300000  | 1. 9456267064 |
| 3. 3281200000  | 1. 8958762658 |
| 3. 6642000000  | 1. 8462901957 |
| 4. 0002700000  | 1. 7971743118 |
| 4. 3363300000  | 1. 7490247456 |
| 4. 6723500000  | 1. 7029596246 |
| 5. 0082400000  | 1. 6608235282 |
| 5. 3437800000  | 1. 6273486761 |
| 5. 6787900000  | 1. 6049712799 |
| 6. 0132300000  | 1. 6003538503 |
| 6. 3333600000  | 1. 5839732625 |
| 6. 6543200000  | 1. 5933484493 |
| 6. 9826400000  | 1. 5727994645 |
| 7. 2849000000  | 1. 5824142441 |
| 7. 6075400000  | 1. 5844045701 |
| 7. 9250200000  | 1. 5700742990 |
| 8. 2373900000  | 1. 5801274975 |
| 8. 5314400000  | 1. 5776549846 |
| 8. 8292900000  | 1. 5623444383 |
| 9. 1471400000  | 1. 5901940155 |
| 9. 4583300000  | 1. 5582162582 |
| 9. 7626800000  | 1. 5778349347 |
| 10. 0704300000 | 1. 5677008588 |
| 10. 3701700000 | 1. 5666871821 |
| 10. 6699700000 | 1. 5725025167 |
| 10. 9690800000 | 1. 5660519680 |
| 11. 2817700000 | 1. 5678269391 |
| 11. 6048100000 | 1. 5671493614 |
| 11. 9245800000 | 1. 5672429774 |
| 12. 2547700000 | 1. 5668175160 |
| 12. 5825500000 | 1. 5675653481 |
| 12. 9110000000 | 1. 5646867231 |
| 13. 2344300000 | 1. 5675008133 |
| 13. 5609000000 | 1. 5641039934 |
| 13. 8857300000 | 1. 5672144881 |
| 14. 2027400000 | 1. 5637746666 |
| 14. 5241700000 | 1. 5657839600 |
| 14. 8450800000 | 1. 5638872255 |
| 15. 1694800000 | 1. 5650104771 |
| 15. 4891600000 | 1. 5631963089 |
| 15. 8087000000 | 1. 5648087849 |
| 16. 1292400000 | 1. 5620555014 |
| 16. 4443500000 | 1. 5650140427 |
| 16. 7480700000 | 1. 5618142986 |

|                |               |
|----------------|---------------|
| 17. 0560400000 | 1. 5640440769 |
| 17. 3533900000 | 1. 5617892957 |
| 17. 6665300000 | 1. 5629298400 |
| 17. 9775400000 | 1. 5614516521 |
| 18. 2797800000 | 1. 5628128365 |
| 18. 5876500000 | 1. 5614861372 |
| 18. 9080600000 | 1. 5615442420 |
| 19. 2227000000 | 1. 5614130579 |
| 19. 5239700000 | 1. 5613354600 |
| 19. 8231000000 | 1. 5609557619 |
| 20. 1142700000 | 1. 5605235204 |
| 20. 4202000000 | 1. 5605479295 |
| 20. 7300500000 | 1. 5599468049 |
| 21. 0258400000 | 1. 5607478231 |
| 21. 3162300000 | 1. 5596177348 |
| 21. 6113800000 | 1. 5599967693 |
| 21. 9269800000 | 1. 5592382172 |
| 22. 2253500000 | 1. 5593863057 |
| 22. 5157300000 | 1. 5597411987 |
| 22. 7934600000 | 1. 5592274865 |
| 23. 0785900000 | 1. 5593017625 |
| 23. 3819400000 | 1. 5589882393 |
| 23. 7017400000 | 1. 5587269946 |
| 23. 9944800000 | 1. 5587983198 |
| 24. 2925300000 | 1. 5588447173 |
| 24. 5879000000 | 1. 5578567511 |
| 24. 8749000000 | 1. 5584647249 |
| 25. 1911100000 | 1. 5575774770 |
| 25. 4786600000 | 1. 5577817669 |
| 25. 7651200000 | 1. 5581351624 |
| 26. 0521900000 | 1. 5579268613 |
| 26. 3757500000 | 1. 5570256141 |
| 26. 6689500000 | 1. 5577676482 |
| 26. 9705900000 | 1. 5573916948 |
| 27. 2589100000 | 1. 5570103603 |
| 27. 5567300000 | 1. 5586069954 |
| 27. 8550000000 | 1. 5563333687 |
| 28. 1671100000 | 1. 5568677529 |
| 28. 4732900000 | 1. 5580414933 |
| 28. 7659100000 | 1. 5536471427 |
| 29. 0505200000 | 1. 5573318924 |
| 29. 3458900000 | 1. 5567600677 |
| 29. 6316000000 | 1. 5550727710 |
| 29. 9347900000 | 1. 5552641896 |

|               |              |
|---------------|--------------|
| 30.2319300000 | 1.5556923630 |
| 30.5120800000 | 1.5555614666 |
| 30.7888800000 | 1.5560799062 |
| 31.1047400000 | 1.5545884149 |

### **E-TS3-d(C2-C3)**

# Bond Length (18C, 20C) along IRC

# X-Axis: Intrinsic Reaction Coordinate

# Y-Axis: Bond Length (Angstroms)

| #             | X            | Y |
|---------------|--------------|---|
| 0.0000000000  | 2.4032720794 |   |
| 0.3408600000  | 2.3586902610 |   |
| 0.6530300000  | 2.3163797743 |   |
| 0.9932800000  | 2.2695059609 |   |
| 1.3337800000  | 2.2240228072 |   |
| 1.6744400000  | 2.1790729163 |   |
| 2.0151600000  | 2.1338701282 |   |
| 2.3559200000  | 2.0880236998 |   |
| 2.6966800000  | 2.0413015256 |   |
| 3.0374500000  | 1.9936880577 |   |
| 3.3782200000  | 1.9451012193 |   |
| 3.7189800000  | 1.8954939285 |   |
| 4.0597200000  | 1.8449038577 |   |
| 4.4004100000  | 1.7938557794 |   |
| 4.7410200000  | 1.7436110752 |   |
| 5.0814900000  | 1.6972418238 |   |
| 5.4217600000  | 1.6592306887 |   |
| 5.7617300000  | 1.6338236749 |   |
| 6.1002300000  | 1.6176056614 |   |
| 6.4270800000  | 1.6086720342 |   |
| 6.7617300000  | 1.5934896917 |   |
| 7.0938000000  | 1.5986380736 |   |
| 7.4118100000  | 1.5822269227 |   |
| 7.7258900000  | 1.5890239487 |   |
| 8.0361500000  | 1.5656352638 |   |
| 8.3538500000  | 1.5938988617 |   |
| 8.6676000000  | 1.5741625506 |   |
| 8.9848400000  | 1.5737702173 |   |
| 9.2984700000  | 1.5737772135 |   |
| 9.5914100000  | 1.5869736802 |   |
| 9.8891700000  | 1.5588186020 |   |
| 10.1881400000 | 1.5846308925 |   |
| 10.4935800000 | 1.5746851613 |   |
| 10.8188200000 | 1.5747389423 |   |
| 11.1234900000 | 1.5755528872 |   |

|                |               |
|----------------|---------------|
| 11. 4455900000 | 1. 5679557267 |
| 11. 7486900000 | 1. 5768564596 |
| 12. 0522300000 | 1. 5712192272 |
| 12. 3717000000 | 1. 5715323331 |
| 12. 6798700000 | 1. 5732589099 |
| 12. 9870500000 | 1. 5721923803 |
| 13. 2957800000 | 1. 5727739043 |
| 13. 6014700000 | 1. 5727700641 |
| 13. 9290000000 | 1. 5719660270 |
| 14. 2352000000 | 1. 5722593554 |
| 14. 5670300000 | 1. 5725887939 |
| 14. 8876400000 | 1. 5714311743 |
| 15. 2117300000 | 1. 5726867340 |
| 15. 5267800000 | 1. 5721877040 |
| 15. 8411700000 | 1. 5718557599 |
| 16. 1727300000 | 1. 5724746264 |
| 16. 4711300000 | 1. 5718424196 |
| 16. 7614200000 | 1. 5720146888 |
| 17. 0730900000 | 1. 5720544078 |
| 17. 4001100000 | 1. 5711873089 |
| 17. 6913400000 | 1. 5724278856 |
| 18. 0196100000 | 1. 5707185587 |
| 18. 3173700000 | 1. 5724246322 |
| 18. 6104200000 | 1. 5723160807 |
| 18. 9433000000 | 1. 5708270323 |
| 19. 2225200000 | 1. 5738297592 |
| 19. 5123500000 | 1. 5722917229 |
| 19. 8400500000 | 1. 5713599189 |
| 20. 1704700000 | 1. 5728722705 |
| 20. 4954000000 | 1. 5715034010 |
| 20. 8163500000 | 1. 5721949370 |
| 21. 1304000000 | 1. 5723044554 |
| 21. 4467200000 | 1. 5714011988 |
| 21. 7556400000 | 1. 5730250688 |
| 22. 0524800000 | 1. 5719949145 |
| 22. 3350900000 | 1. 5721602937 |
| 22. 6616900000 | 1. 5720983893 |
| 22. 9461700000 | 1. 5725497513 |
| 23. 2670000000 | 1. 5712939569 |
| 23. 5568500000 | 1. 5723524362 |
| 23. 8085900000 | 1. 5730612132 |
| 24. 1202000000 | 1. 5727641268 |
| 24. 4275400000 | 1. 5722058421 |
| 24. 7479900000 | 1. 5725337804 |



|               |              |
|---------------|--------------|
| 25.0408000000 | 1.5721754306 |
| 25.3514200000 | 1.5718535627 |
| 25.6232100000 | 1.5726015914 |
| 25.9219100000 | 1.5727254502 |
| 26.2070300000 | 1.5723042845 |
| 26.5336300000 | 1.5722942618 |
| 26.8223000000 | 1.5729286991 |
| 27.1323200000 | 1.5718756930 |
| 27.4175000000 | 1.5716822542 |
| 27.7076600000 | 1.5715231176 |
| 28.0063100000 | 1.5727017736 |
| 28.2983100000 | 1.5727824995 |
| 28.6255100000 | 1.5719087936 |
| 28.9262000000 | 1.5720797400 |
| 29.1795900000 | 1.5725096109 |
| 29.4903800000 | 1.5714063026 |
| 29.8066600000 | 1.5723169893 |
| 30.0978000000 | 1.5721185642 |
| 30.3809600000 | 1.5730102635 |
| 30.6722900000 | 1.5720620020 |
| 30.9565800000 | 1.5716129416 |
| 31.2891300000 | 1.5727142656 |

### E-TS3-d(C1-C5)

# Bond Length (19C, 25C) along IRC

# X-Axis: Intrinsic Reaction Coordinate

# Y-Axis: Bond Length (Angstroms)

| #            | X            | Y |
|--------------|--------------|---|
| 0.0000000000 | 2.2768565949 |   |
| 0.3408600000 | 2.2245514066 |   |
| 0.6530300000 | 2.1879264903 |   |
| 0.9932800000 | 2.1377042531 |   |
| 1.3337800000 | 2.0851715950 |   |
| 1.6744400000 | 2.0318396854 |   |
| 2.0151600000 | 1.9786437253 |   |
| 2.3559200000 | 1.9261386800 |   |
| 2.6966800000 | 1.8747939662 |   |
| 3.0374500000 | 1.8249713900 |   |
| 3.3782200000 | 1.7772263220 |   |
| 3.7189800000 | 1.7322808981 |   |
| 4.0597200000 | 1.6911937869 |   |
| 4.4004100000 | 1.6551347862 |   |
| 4.7410200000 | 1.6256686511 |   |
| 5.0814900000 | 1.6032791178 |   |
| 5.4217600000 | 1.5886591053 |   |

|                |               |
|----------------|---------------|
| 5. 7617300000  | 1. 5771937472 |
| 6. 1002300000  | 1. 5779692001 |
| 6. 4270800000  | 1. 5669229256 |
| 6. 7617300000  | 1. 5747665612 |
| 7. 0938000000  | 1. 5611727226 |
| 7. 4118100000  | 1. 5681199494 |
| 7. 7258900000  | 1. 5634176635 |
| 8. 0361500000  | 1. 5771543209 |
| 8. 3538500000  | 1. 5517788861 |
| 8. 6676000000  | 1. 5711129763 |
| 8. 9848400000  | 1. 5564224821 |
| 9. 2984700000  | 1. 5626485692 |
| 9. 5914100000  | 1. 5741198665 |
| 9. 8891700000  | 1. 5425487478 |
| 10. 1881400000 | 1. 5734147878 |
| 10. 4935800000 | 1. 5602574363 |
| 10. 8188200000 | 1. 5631384046 |
| 11. 1234900000 | 1. 5585861451 |
| 11. 4455900000 | 1. 5599163787 |
| 11. 7486900000 | 1. 5570381652 |
| 12. 0522300000 | 1. 5599879981 |
| 12. 3717000000 | 1. 5544013568 |
| 12. 6798700000 | 1. 5587691025 |
| 12. 9870500000 | 1. 5565714980 |
| 13. 2957800000 | 1. 5566003440 |
| 13. 6014700000 | 1. 5570780868 |
| 13. 9290000000 | 1. 5547589272 |
| 14. 2352000000 | 1. 5566911813 |
| 14. 5670300000 | 1. 5539991102 |
| 14. 8876400000 | 1. 5563248832 |
| 15. 2117300000 | 1. 5543397730 |
| 15. 5267800000 | 1. 5544826170 |
| 15. 8411700000 | 1. 5539731112 |
| 16. 1727300000 | 1. 5537738076 |
| 16. 4711300000 | 1. 5531652361 |
| 16. 7614200000 | 1. 5539509351 |
| 17. 0730900000 | 1. 5529612390 |
| 17. 4001100000 | 1. 5526821061 |
| 17. 6913400000 | 1. 5527020960 |
| 18. 0196100000 | 1. 5512722303 |
| 18. 3173700000 | 1. 5530058568 |
| 18. 6104200000 | 1. 5512247697 |
| 18. 9433000000 | 1. 5517869953 |
| 19. 2225200000 | 1. 5510078669 |

|                |               |
|----------------|---------------|
| 19. 5123500000 | 1. 5512386559 |
| 19. 8400500000 | 1. 5505921775 |
| 20. 1704700000 | 1. 5499878037 |
| 20. 4954000000 | 1. 5501518686 |
| 20. 8163500000 | 1. 5492876138 |
| 21. 1304000000 | 1. 5490971796 |
| 21. 4467200000 | 1. 5487653932 |
| 21. 7556400000 | 1. 5482875751 |
| 22. 0524800000 | 1. 5483339560 |
| 22. 3350900000 | 1. 5479212847 |
| 22. 6616900000 | 1. 5479312387 |
| 22. 9461700000 | 1. 5477250241 |
| 23. 2670000000 | 1. 5475539324 |
| 23. 5568500000 | 1. 5470093768 |
| 23. 8085900000 | 1. 5476082717 |
| 24. 1202000000 | 1. 5469194076 |
| 24. 4275400000 | 1. 5466479980 |
| 24. 7479900000 | 1. 5470390477 |
| 25. 0408000000 | 1. 5467025081 |
| 25. 3514200000 | 1. 5456253885 |
| 25. 6232100000 | 1. 5466254494 |
| 25. 9219100000 | 1. 5459033947 |
| 26. 2070300000 | 1. 5460697362 |
| 26. 5336300000 | 1. 5453672533 |
| 26. 8223000000 | 1. 5463564770 |
| 27. 1323200000 | 1. 5451539610 |
| 27. 4175000000 | 1. 5460649805 |
| 27. 7076600000 | 1. 5451342895 |
| 28. 0063100000 | 1. 5451791875 |
| 28. 2983100000 | 1. 5450958686 |
| 28. 6255100000 | 1. 5450379156 |
| 28. 9262000000 | 1. 5449066060 |
| 29. 1795900000 | 1. 5450855117 |
| 29. 4903800000 | 1. 5449660615 |
| 29. 8066600000 | 1. 5443212592 |
| 30. 0978000000 | 1. 5446016075 |
| 30. 3809600000 | 1. 5444263597 |
| 30. 6722900000 | 1. 5448105247 |
| 30. 9565800000 | 1. 5438914136 |
| 31. 2891300000 | 1. 5440911391 |

## Comparison with the other solvents

### THF

**1a- THF**

O 1

|   |             |             |             |
|---|-------------|-------------|-------------|
| C | 1.34127900  | -0.74899500 | 0.00000600  |
| C | 2.41236100  | 0.15722300  | 0.00001300  |
| C | 3.72858600  | -0.27425000 | -0.00000900 |
| C | 3.94621800  | -1.65649800 | -0.00001000 |
| C | 2.88958800  | -2.56801100 | 0.00000300  |
| C | 1.56818400  | -2.11607300 | 0.00000900  |
| C | 0.10850700  | 0.04582700  | -0.00002200 |
| H | 4.55698600  | 0.42601000  | -0.00003400 |
| H | 4.96711600  | -2.02551500 | -0.00001900 |
| H | 3.09748900  | -3.63247200 | 0.00000300  |
| H | 0.73183500  | -2.80853800 | 0.00002000  |
| N | 1.93510000  | 1.47783400  | 0.00001700  |
| O | -0.14182700 | 2.49797000  | -0.00004600 |
| C | 0.56576200  | 1.50878700  | -0.00003300 |
| N | -1.07873400 | -0.39808000 | -0.00006200 |
| C | -2.19019700 | 0.53352300  | -0.00020400 |
| H | -2.19206100 | 1.18005200  | -0.88356800 |
| H | -2.19202700 | 1.18041800  | 0.88289200  |
| C | -3.46387600 | -0.27157300 | 0.00000100  |
| F | -3.55658000 | -1.06369300 | -1.07834800 |
| F | -4.53768700 | 0.53459200  | -0.00027800 |
| F | -3.55662600 | -1.06297300 | 1.07888100  |
| C | 2.77541300  | 2.65510600  | 0.00006000  |
| H | 3.40704100  | 2.67389900  | -0.89230400 |
| H | 2.12354600  | 3.52868900  | 0.00022300  |
| H | 3.40721600  | 2.67369100  | 0.89230200  |

**2a- THF**

O 1

|   |             |             |             |
|---|-------------|-------------|-------------|
| C | -1.65148900 | 0.26161100  | 0.00001600  |
| C | -0.86794900 | 1.42460100  | -0.00003300 |
| C | 0.51224400  | 1.31454200  | -0.00005200 |
| C | 1.04336400  | 0.03314100  | -0.00002400 |
| C | 0.21031300  | -1.08355900 | 0.00002200  |
| N | -1.11007000 | -0.97005400 | 0.00004200  |
| H | 1.16155500  | 2.18207500  | -0.00008700 |
| H | -1.34529500 | 2.39824500  | -0.00005400 |
| H | 0.63492000  | -2.08280000 | 0.00004400  |
| N | 2.48994100  | -0.15384600 | -0.00004100 |
| O | 2.91564100  | -1.29672400 | -0.00002700 |
| O | 3.19125100  | 0.84342700  | -0.00006800 |
| C | -3.12043300 | 0.37188700  | 0.00004400  |
| H | -3.51782700 | 1.38380500  | 0.00000400  |

|   |             |             |            |
|---|-------------|-------------|------------|
| C | -3.93943400 | -0.67994600 | 0.00011700 |
| H | -3.55102000 | -1.69377000 | 0.00016100 |
| H | -5.01626900 | -0.54754600 | 0.00013800 |

**E-TS1- THF**

0 1

|   |             |             |             |
|---|-------------|-------------|-------------|
| C | -1.29844000 | 2.09071200  | -0.92259400 |
| C | 0.07314100  | 2.15495500  | -0.60554200 |
| C | 0.59443800  | 3.29447600  | -0.00767700 |
| C | -0.26362400 | 4.36685800  | 0.25511800  |
| C | -1.61864500 | 4.29016700  | -0.07053900 |
| C | -2.16152600 | 3.14504600  | -0.66431000 |
| C | -0.45319100 | 0.05981300  | -1.55796500 |
| H | 1.64962100  | 3.33897400  | 0.24712900  |
| H | 0.12768500  | 5.26876300  | 0.71481800  |
| H | -2.26841700 | 5.13385700  | 0.14066500  |
| H | -3.21673600 | 3.08655100  | -0.91203800 |
| N | -1.58934100 | 0.84112700  | -1.48000300 |
| C | -2.89916600 | 0.39801500  | -1.89786700 |
| H | -3.60574500 | 0.43438000  | -1.06210700 |
| H | -3.28001500 | 1.02029200  | -2.71329300 |
| H | -2.80236400 | -0.63156400 | -2.24651600 |
| O | -0.41833400 | -1.08845300 | -1.99392900 |
| C | 1.19651500  | 0.45629900  | 2.30404800  |
| C | 1.06051900  | 1.66859000  | 2.84700000  |
| C | 2.26310200  | -0.82896100 | -0.76955100 |
| H | 1.93745200  | 2.22958900  | 3.15286200  |
| C | 3.70403800  | -1.01763400 | -0.46982100 |
| F | 4.00919900  | -2.32778600 | -0.37588000 |
| F | 4.54894100  | -0.50534300 | -1.39701300 |
| F | 4.06761500  | -0.44400900 | 0.69913400  |
| C | 0.65320100  | 0.86487100  | -0.96410500 |
| N | 1.84752700  | 0.46016300  | -0.65124400 |
| C | 0.06680000  | -0.34745200 | 1.83260100  |
| C | -1.27661600 | -0.08233100 | 2.13621900  |
| C | -0.56641000 | -2.20401400 | 0.52516400  |
| C | -2.26881800 | -0.88981300 | 1.61633800  |
| H | -1.53151800 | 0.75894700  | 2.76799400  |
| C | -1.89223500 | -1.97099500 | 0.82153400  |
| H | -0.24165300 | -2.98109200 | -0.15644800 |
| H | -3.31741000 | -0.70018400 | 1.81613800  |
| N | 0.36769700  | -1.40307100 | 1.04204800  |
| N | -2.90721400 | -2.82206800 | 0.21091100  |
| O | -4.06883900 | -2.47384000 | 0.32412000  |
| O | -2.52856700 | -3.81717500 | -0.37892100 |

|   |            |             |             |
|---|------------|-------------|-------------|
| H | 0.09659800 | 2.14738800  | 2.99214200  |
| H | 2.18206800 | 0.03214100  | 2.13603400  |
| H | 1.87323900 | -1.48461000 | -1.54887200 |
| H | 1.38215400 | -1.34813200 | 0.42486200  |

**E-TS3-a- THF**

0 1

|   |             |             |             |
|---|-------------|-------------|-------------|
| C | -1.17375200 | 1.75206700  | 0.75818200  |
| C | -0.38890500 | 0.68757000  | 1.25503800  |
| C | -0.96336100 | -0.28706000 | 2.06914900  |
| C | -2.32151300 | -0.19325300 | 2.36486300  |
| C | -3.09067200 | 0.85678900  | 1.85259800  |
| C | -2.52690500 | 1.85258200  | 1.04977500  |
| C | 0.92414000  | 2.11896300  | -0.09101900 |
| H | -0.36716400 | -1.10947800 | 2.45557900  |
| H | -2.79026400 | -0.94812900 | 2.98711000  |
| H | -4.14969600 | 0.90471700  | 2.08612900  |
| H | -3.12854300 | 2.66664000  | 0.65813600  |
| N | -0.38484900 | 2.57993000  | -0.03523100 |
| C | -0.84007500 | 3.78784000  | -0.68303400 |
| H | -1.66620500 | 3.56756900  | -1.36603100 |
| H | -1.17230700 | 4.52437600  | 0.05471200  |
| H | -0.00089800 | 4.19666600  | -1.24674600 |
| O | 1.85668500  | 2.68374000  | -0.65473300 |
| C | 1.16217700  | -0.11404900 | -2.08339700 |
| C | 2.32700100  | -0.77997400 | -1.80795000 |
| C | 3.07347800  | 0.06626000  | 0.07540500  |
| C | 4.14806100  | -0.88471200 | 0.48421100  |
| F | 4.93203900  | -0.39693400 | 1.46105500  |
| F | 3.62206900  | -2.03390700 | 0.94742000  |
| F | 4.94897400  | -1.18132000 | -0.54470800 |
| C | 0.91588100  | 0.86676800  | 0.68441400  |
| N | 1.96419500  | 0.04974200  | 0.82347900  |
| C | -0.15636100 | -0.56906100 | -1.69974600 |
| C | -1.29102600 | 0.17592600  | -2.09405500 |
| C | -1.46207700 | -2.03943800 | -0.50856000 |
| C | -2.53732900 | -0.19042900 | -1.63451800 |
| H | -1.16484700 | 1.04766500  | -2.72776400 |
| C | -2.61486200 | -1.31285900 | -0.81271100 |
| H | -1.53241600 | -2.92456300 | 0.11744700  |
| H | -3.43147700 | 0.37189700  | -1.87821900 |
| N | -0.26196900 | -1.68686800 | -0.94108600 |
| N | -3.87604900 | -1.69385800 | -0.22223200 |
| O | -4.87105400 | -1.04911300 | -0.52330100 |
| O | -3.88722200 | -2.64072300 | 0.55273100  |

|   |            |             |             |
|---|------------|-------------|-------------|
| H | 2.28511500 | -1.79258800 | -1.41500800 |
| H | 1.20195600 | 0.82281300  | -2.63256000 |
| H | 3.36915200 | 1.00666200  | -0.37012400 |
| H | 3.23895900 | -0.48997700 | -2.31957600 |
| H | 1.80092200 | -0.79223500 | 1.37906700  |

**E-TS3-b-THF**

0 1

|   |             |             |             |
|---|-------------|-------------|-------------|
| C | -1.35815600 | 2.60633900  | -0.42664800 |
| C | -2.05701600 | 1.38924900  | -0.21819100 |
| C | -3.32275300 | 1.41929200  | 0.36384600  |
| C | -3.87084400 | 2.65344000  | 0.72090400  |
| C | -3.16755300 | 3.83873700  | 0.51067400  |
| C | -1.89421500 | 3.83091000  | -0.06825700 |
| C | 0.04268400  | 1.00645100  | -1.24782000 |
| H | -3.88331500 | 0.50948400  | 0.55063200  |
| H | -4.85698500 | 2.68671000  | 1.17198600  |
| H | -3.61174300 | 4.78552100  | 0.80078600  |
| H | -1.34600900 | 4.75272600  | -0.23418000 |
| N | -0.11819200 | 2.35359100  | -1.01872000 |
| C | 0.88102800  | 3.34978000  | -1.32919200 |
| H | 0.49506600  | 4.07520300  | -2.05090900 |
| H | 1.19400600  | 3.87496200  | -0.42164700 |
| H | 1.73791100  | 2.83211400  | -1.76202800 |
| O | 1.00005300  | 0.44792900  | -1.76668600 |
| C | -0.51670300 | -0.33800500 | 1.86686200  |
| C | -1.22009800 | -1.51797400 | 1.88152600  |
| C | -2.08410700 | -1.74831200 | -0.12513600 |
| C | -2.01073000 | -3.20912500 | -0.41470400 |
| F | -2.72477900 | -3.56832900 | -1.49646500 |
| F | -0.74434000 | -3.59493600 | -0.63797900 |
| F | -2.48731000 | -3.91866900 | 0.61565300  |
| C | -1.16061000 | 0.36109300  | -0.69536700 |
| N | -1.25846600 | -0.95975800 | -0.82110000 |
| C | 0.85002600  | -0.26727200 | 1.38794100  |
| C | 1.62531300  | 0.90081400  | 1.57622600  |
| C | 2.58230800  | -1.30827600 | 0.28232100  |
| C | 2.91747500  | 0.93981400  | 1.10269800  |
| H | 1.19265600  | 1.75286100  | 2.09059100  |
| C | 3.40229900  | -0.19912500 | 0.45781800  |
| H | 2.95478400  | -2.18272600 | -0.24318600 |
| H | 3.55149200  | 1.81047800  | 1.22607800  |
| N | 1.33565400  | -1.34740100 | 0.73481900  |
| N | 4.75267800  | -0.21797400 | -0.06150600 |
| O | 5.43378200  | 0.78804700  | 0.07681500  |

|   |             |             |             |
|---|-------------|-------------|-------------|
| O | 5.14538400  | -1.23716300 | -0.61102300 |
| H | -0.67584000 | -2.45026500 | 1.76273700  |
| H | -0.95099600 | 0.57398500  | 2.26444400  |
| H | -3.05930400 | -1.36626700 | 0.14315600  |
| H | -2.16843700 | -1.57023300 | 2.40698500  |
| H | -0.41099100 | -1.38384700 | -1.21662200 |

## Toluene

### 1a-Toluene

0 1

|   |             |             |             |
|---|-------------|-------------|-------------|
| C | 1.34272800  | -0.74821900 | 0.00009800  |
| C | 2.41408900  | 0.15736300  | -0.00000400 |
| C | 3.72957200  | -0.27532500 | -0.00013300 |
| C | 3.94658700  | -1.65738900 | -0.00011500 |
| C | 2.88960100  | -2.56734500 | 0.00001900  |
| C | 1.56876700  | -2.11469200 | 0.00012400  |
| C | 0.10910000  | 0.04572700  | 0.00012900  |
| H | 4.55856600  | 0.42412500  | -0.00025500 |
| H | 4.96703200  | -2.02729600 | -0.00020500 |
| H | 3.09698400  | -3.63174800 | 0.00003600  |
| H | 0.72989200  | -2.80368100 | 0.00022800  |
| N | 1.93608200  | 1.47794700  | 0.00001100  |
| O | -0.14125000 | 2.49730300  | 0.00006300  |
| C | 0.56456000  | 1.50816200  | 0.00005900  |
| N | -1.07723500 | -0.39899400 | 0.00013000  |
| C | -2.18996000 | 0.52998100  | 0.00003300  |
| H | -2.19059700 | 1.17901900  | -0.88166200 |
| H | -2.19073900 | 1.17902400  | 0.88172800  |
| C | -3.46508100 | -0.27524200 | -0.00005100 |
| F | -3.55716600 | -1.06349600 | -1.07913700 |
| F | -4.53477700 | 0.53677300  | -0.00019200 |
| F | -3.55736700 | -1.06336600 | 1.07911300  |
| C | 2.76953000  | 2.65815200  | -0.00003900 |
| H | 3.40121700  | 2.68323000  | -0.89262700 |
| H | 2.11098200  | 3.52693900  | 0.00017100  |
| H | 3.40155300  | 2.68304900  | 0.89231600  |

### 2a-Toluene

0 1

|   |             |             |             |
|---|-------------|-------------|-------------|
| C | -1.65214000 | 0.26475700  | 0.00001100  |
| C | -0.86654200 | 1.42670800  | -0.00003300 |
| C | 0.51348300  | 1.31425500  | -0.00005000 |
| C | 1.04305200  | 0.03265700  | -0.00002400 |
| C | 0.20735700  | -1.08211900 | 0.00001700  |
| N | -1.11231600 | -0.96657300 | 0.00003500  |



|   |             |             |             |
|---|-------------|-------------|-------------|
| H | 1.16838500  | 2.17750100  | -0.00008100 |
| H | -1.34169400 | 2.40147700  | -0.00005200 |
| H | 0.63176200  | -2.08137800 | 0.00003700  |
| N | 2.49103000  | -0.15540800 | -0.00003800 |
| O | 2.91279600  | -1.29858300 | -0.00002200 |
| O | 3.18997500  | 0.84267900  | -0.00006600 |
| C | -3.12115100 | 0.37242800  | 0.00004000  |
| H | -3.52385900 | 1.38223900  | -0.00000600 |
| C | -3.93414400 | -0.68326400 | 0.00012200  |
| H | -3.53561000 | -1.69284000 | 0.00017300  |
| H | -5.01163700 | -0.55842900 | 0.00014300  |

### E-TS1-Toluene

O 1

|   |             |             |             |
|---|-------------|-------------|-------------|
| C | -1.45139200 | 1.91298900  | -0.94586000 |
| C | -0.08471100 | 2.08163500  | -0.64322800 |
| C | 0.35512400  | 3.26532700  | -0.06517300 |
| C | -0.57855000 | 4.27269300  | 0.19525000  |
| C | -1.92688100 | 4.09230300  | -0.11481100 |
| C | -2.38768300 | 2.90337800  | -0.69071800 |
| C | -0.46423100 | -0.06447900 | -1.54676700 |
| H | 1.40800300  | 3.39257800  | 0.16891600  |
| H | -0.25082000 | 5.20806700  | 0.63750500  |
| H | -2.63549600 | 4.88847500  | 0.09055300  |
| H | -3.43744500 | 2.76401700  | -0.92939100 |
| N | -1.65418500 | 0.63824900  | -1.48249900 |
| C | -2.92499800 | 0.09730900  | -1.90156500 |
| H | -3.62022300 | 0.01989600  | -1.05794100 |
| H | -3.37457100 | 0.72314400  | -2.67825900 |
| H | -2.73952000 | -0.89917200 | -2.30598100 |
| O | -0.35720000 | -1.22443200 | -1.93748700 |
| C | 1.25895300  | 0.61962400  | 2.23260100  |
| C | 1.10704200  | 1.82112100  | 2.79468400  |
| C | 2.30554500  | -0.73878000 | -0.77408500 |
| H | 1.97905700  | 2.40041300  | 3.07859700  |
| C | 3.76047200  | -0.83999200 | -0.48472500 |
| F | 4.13017800  | -2.12963500 | -0.35205000 |
| F | 4.56200400  | -0.31399100 | -1.43504400 |
| F | 4.09933000  | -0.21372300 | 0.66485800  |
| C | 0.58446200  | 0.83320300  | -0.98644000 |
| N | 1.80886600  | 0.51622900  | -0.67483800 |
| C | 0.14631500  | -0.21774000 | 1.78539900  |
| C | -1.21043200 | 0.07536600  | 1.99867300  |
| C | -0.43680500 | -2.19795400 | 0.64172200  |
| C | -2.17864000 | -0.79248600 | 1.53911300  |

|   |             |             |             |
|---|-------------|-------------|-------------|
| H | -1.49258000 | 0.98884400  | 2.50628100  |
| C | -1.77078200 | -1.95357400 | 0.88141700  |
| H | -0.09295800 | -3.02671600 | 0.03432700  |
| H | -3.23596000 | -0.59139900 | 1.67061100  |
| N | 0.47925300  | -1.34498300 | 1.11170400  |
| N | -2.76199700 | -2.87175200 | 0.33122600  |
| O | -3.92432000 | -2.50720500 | 0.34752700  |
| O | -2.36204300 | -3.93140600 | -0.11044500 |
| H | 0.13936600  | 2.27541200  | 2.98269800  |
| H | 2.25244500  | 0.22718100  | 2.03902900  |
| H | 1.93517600  | -1.44505000 | -1.51735200 |
| H | 1.47001400  | -1.28906800 | 0.49169900  |

### E-TS3-a-Toluene

0 1

|   |             |             |             |
|---|-------------|-------------|-------------|
| C | -1.16698500 | 1.82324600  | 0.71335500  |
| C | -0.41930800 | 0.73521100  | 1.21706700  |
| C | -1.03334700 | -0.22219100 | 2.02224200  |
| C | -2.39235400 | -0.09283900 | 2.29815600  |
| C | -3.12477800 | 0.97681600  | 1.77478700  |
| C | -2.52132500 | 1.95781600  | 0.98366300  |
| C | 0.95806000  | 2.14447700  | -0.08825000 |
| H | -0.47001500 | -1.06217900 | 2.42062700  |
| H | -2.89071100 | -0.83651000 | 2.91031000  |
| H | -4.18570700 | 1.05145400  | 1.99043200  |
| H | -3.09453100 | 2.78907900  | 0.58585900  |
| N | -0.34223900 | 2.63639700  | -0.05914200 |
| C | -0.73468100 | 3.88268100  | -0.67202900 |
| H | -1.53127200 | 3.72227400  | -1.40518900 |
| H | -1.08101900 | 4.59590600  | 0.08223100  |
| H | 0.14285800  | 4.29025900  | -1.17532400 |
| O | 1.91492400  | 2.68994300  | -0.62667000 |
| C | 1.15981000  | -0.07333000 | -2.07919100 |
| C | 2.33372800  | -0.72949900 | -1.82142300 |
| C | 3.05719700  | 0.05234200  | 0.09933900  |
| C | 4.09201200  | -0.94037500 | 0.51281500  |
| F | 4.87488500  | -0.49301000 | 1.50791600  |
| F | 3.51187000  | -2.07321400 | 0.95382500  |
| F | 4.89762200  | -1.25599900 | -0.50545700 |
| C | 0.90060500  | 0.88515700  | 0.67180400  |
| N | 1.92772900  | 0.04255700  | 0.81796300  |
| C | -0.14767700 | -0.56436600 | -1.69777500 |
| C | -1.30371800 | 0.14627600  | -2.08850200 |
| C | -1.40502900 | -2.06882100 | -0.49895900 |
| C | -2.53750200 | -0.25425300 | -1.62152800 |

|   |             |             |             |
|---|-------------|-------------|-------------|
| H | -1.20554600 | 1.01957500  | -2.72451600 |
| C | -2.57901100 | -1.37706600 | -0.80041700 |
| H | -1.44937400 | -2.95303300 | 0.13035200  |
| H | -3.45028400 | 0.28122000  | -1.85561800 |
| N | -0.21681500 | -1.68038500 | -0.93343900 |
| N | -3.82661400 | -1.78409400 | -0.19178300 |
| O | -4.83982400 | -1.17432400 | -0.49871200 |
| O | -3.79909200 | -2.71222600 | 0.60345500  |
| H | 2.30093500  | -1.75391500 | -1.45996600 |
| H | 1.18325200  | 0.87360700  | -2.61151400 |
| H | 3.38512900  | 0.99953400  | -0.30768300 |
| H | 3.24214200  | -0.41448000 | -2.32415600 |
| H | 1.72806100  | -0.81893900 | 1.32690700  |

### E-TS3-b-Toluene

O 1

|   |             |             |             |
|---|-------------|-------------|-------------|
| C | 1.48128500  | -2.56267200 | -0.41862200 |
| C | 2.12174400  | -1.31280200 | -0.21222600 |
| C | 3.39076800  | -1.28516100 | 0.36152600  |
| C | 4.00250700  | -2.49141100 | 0.70911700  |
| C | 3.35723600  | -3.70829800 | 0.49844600  |
| C | 2.08090200  | -3.75983100 | -0.07041300 |
| C | -0.00109500 | -1.03054300 | -1.22781300 |
| H | 3.90904000  | -0.34991600 | 0.54451300  |
| H | 4.99236800  | -2.47714800 | 1.15246100  |
| H | 3.85040700  | -4.63310500 | 0.77916500  |
| H | 1.57727900  | -4.70685900 | -0.23468400 |
| N | 0.22616600  | -2.36965000 | -0.99884200 |
| C | -0.71751200 | -3.41057300 | -1.32958300 |
| H | -0.29024500 | -4.10839900 | -2.05562800 |
| H | -1.01523900 | -3.96085200 | -0.43162700 |
| H | -1.59431200 | -2.93002200 | -1.76562700 |
| O | -0.98621600 | -0.52115900 | -1.74088500 |
| C | 0.50076300  | 0.34834000  | 1.86741500  |
| C | 1.16056700  | 1.55291500  | 1.88295300  |
| C | 2.00130400  | 1.82460100  | -0.12963500 |
| C | 1.85576700  | 3.28077900  | -0.42026200 |
| F | 2.53868300  | 3.66711800  | -1.51167000 |
| F | 0.57072700  | 3.60479100  | -0.62566300 |
| F | 2.31509200  | 4.01067500  | 0.60353600  |
| C | 1.17279400  | -0.32821100 | -0.68119600 |
| N | 1.20709600  | 0.99560200  | -0.81500800 |
| C | -0.86530700 | 0.23479800  | 1.38937200  |
| C | -1.61368900 | -0.94558800 | 1.59774100  |
| C | -2.61524400 | 1.21486900  | 0.25744700  |

|   |             |             |             |
|---|-------------|-------------|-------------|
| C | -2.90433500 | -1.02094600 | 1.12218900  |
| H | -1.16420800 | -1.77739400 | 2.13036900  |
| C | -3.41132500 | 0.09274400  | 0.45394300  |
| H | -3.00453400 | 2.06821500  | -0.28961600 |
| H | -3.52355700 | -1.89977800 | 1.26043300  |
| N | -1.37051700 | 1.28910200  | 0.71228800  |
| N | -4.76306700 | 0.06889000  | -0.07149900 |
| O | -5.41299700 | -0.95461300 | 0.07779900  |
| O | -5.17754200 | 1.07105000  | -0.63193900 |
| H | 0.58065700  | 2.46336200  | 1.76508100  |
| H | 0.96513500  | -0.54666700 | 2.26951100  |
| H | 2.99841200  | 1.48967700  | 0.12014000  |
| H | 2.10442300  | 1.64037500  | 2.41177500  |
| H | 0.32737400  | 1.37736200  | -1.18286600 |
